# Supplementary material for: Structure transition of Au18 from pyramidal to a hollow-cage during soft-landing onto a TiO2(110) surface
Source: Royal Society of Chemistry journal article supplement (doi:10.1039/c5cc01316j), 2015-01-01
Supplement: c5cc01316j1.pdf [file c5cc01316j1.pdf]

## Electronic Supplementary Information

### Structure Transition of Au<sub>18</sub> from Pyramid to Hollow-Cage during Soft-landing onto TiO<sub>2</sub> (110) Surface

Lei Li,<sup>a</sup> Hui Li<sup>b</sup> and Xiao Cheng Zeng<sup>\*a</sup>

#### Part I: Supplementary Figures

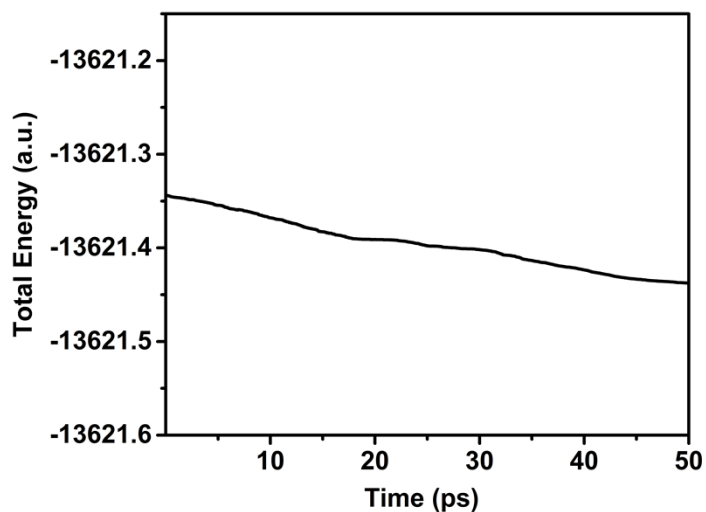

**Figure S1** Time-evolution of the total energy of the Au<sub>18</sub>/TiO<sub>2</sub> system during the soft-landing process of Au<sub>18</sub> onto TiO<sub>2</sub> (110) surface.

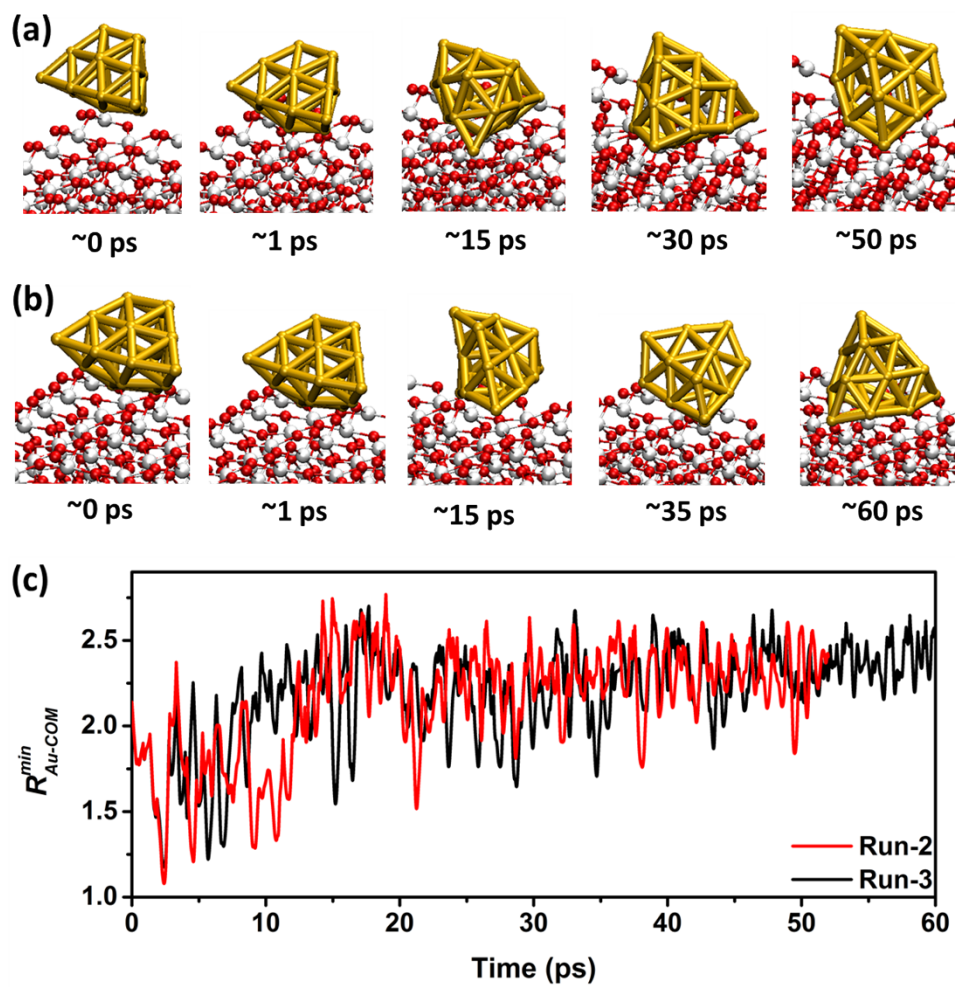

**Figure S2** (a) and (b) present the snapshot structures from two independent BOMD simulations (Run-2 and Run-3, respectively) of the soft-landing of the Au<sub>18</sub> cluster onto the TiO<sub>2</sub> (110) surface. (c) Time-evolution of minimum distance of the Au atoms relative to the center of the mass (COM) of the Au<sub>18</sub> ( $R_{Au-COM}^{min}$ ).

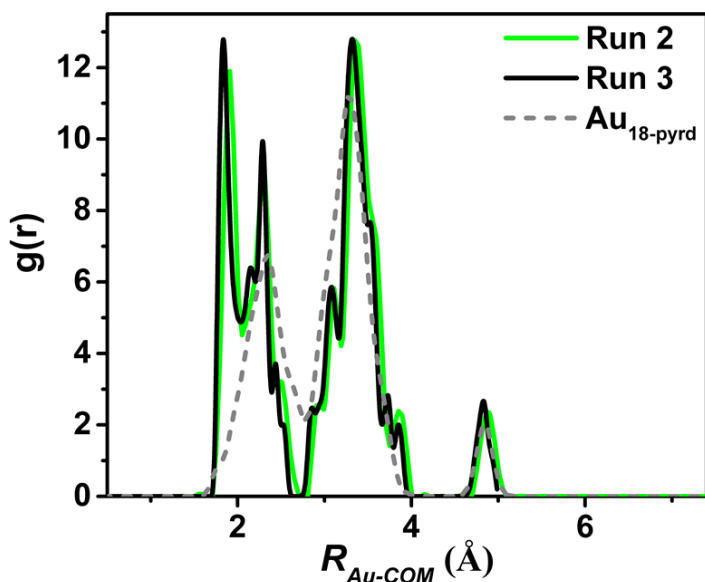

**Figure S3** Computed  $g(r)$  functions of the Au-COM distance for the pre-collision period ( $t < 1$  ps) from the second and the third BOMD simulation Run 2 (green line) and Run 3 (black line). The dashed gray line shows the  $g(r)$  functions for the bare  $\text{Au}_{18}$ -pyrd cluster (without  $\text{TiO}_2$  support).

**Part II: The coordinates for the optimized structures of the  $\text{Au}_{18}/\text{TiO}_2$  systems obtained by soft-landing the  $\text{Au}_{18}$  cluster onto  $\text{TiO}_2$  (110) surface**

- (1) The optimized structure obtained from the first BOMD simulation of the soft-landing of  $\text{Au}_{18}$  onto  $\text{TiO}_2$  (110) surface

|    |              |               |               |
|----|--------------|---------------|---------------|
| Ti | 0.7127383090 | 2.6404330640  | 2.9652979240  |
| Ti | 0.7127383090 | -0.6080154890 | 6.2137464770  |
| Ti | 0.7314376185 | 2.7632727741  | 9.6396952151  |
| Ti | 0.7444427069 | -0.5401312162 | 12.6024203879 |
| Ti | 2.1922383090 | -0.6080154890 | 2.9652979240  |
| Ti | 2.1922383090 | 2.6404330640  | 6.2137464770  |
| Ti | 2.2183559859 | -0.5292373391 | 9.4159039534  |
| Ti | 2.2044516352 | 2.6775947426  | 12.9535010940 |
| O  | 0.7127383090 | -0.6080154890 | 1.6971019120  |
| O  | 0.7127383090 | 2.6404330640  | 4.9455504650  |
| O  | 0.7264711255 | -0.5885322786 | 8.2496681461  |
| O  | 0.7011494899 | 2.7288478465  | 11.5098088340 |
| O  | 0.7127383090 | -0.6080154890 | 4.2334939360  |
| O  | 0.7127383090 | 2.6404330640  | 7.4819424890  |
| O  | 0.7396226795 | -0.6265304663 | 10.7975333027 |
| O  | 0.7717055106 | 2.6370818790  | 14.0670146346 |
| O  | 2.1922383090 | 3.9086290760  | 2.9652979240  |

|    |               |               |               |
|----|---------------|---------------|---------------|
| O  | 2.1922383090  | 0.6601805230  | 6.2137464770  |
| O  | 2.1922335434  | 3.9801879375  | 9.4774897003  |
| O  | 2.2470852692  | 0.6672444329  | 12.8779164811 |
| O  | 2.1922383090  | 1.3722370520  | 2.9652979240  |
| O  | 2.1922383090  | 4.6206856050  | 6.2137464770  |
| O  | 2.1849859853  | 1.3731062281  | 9.5650387378  |
| O  | 2.2250228822  | 4.7036560904  | 12.9670894339 |
| Ti | 3.6717383090  | 2.6404330640  | 2.9652979240  |
| Ti | 3.6717383090  | -0.6080154890 | 6.2137464770  |
| Ti | 3.6883468798  | 2.6799960202  | 9.6214587182  |
| Ti | 3.6978271010  | -0.6194548755 | 12.6003754659 |
| Ti | 5.1512383090  | -0.6080154890 | 2.9652979240  |
| Ti | 5.1512383090  | 2.6404330640  | 6.2137464770  |
| Ti | 5.1744754953  | -0.6337660803 | 9.4190827072  |
| Ti | 5.1168256393  | 2.6875785561  | 12.9653045761 |
| O  | 3.6717383090  | -0.6080154890 | 1.6971019120  |
| O  | 3.6717383090  | 2.6404330640  | 4.9455504650  |
| O  | 3.6966661364  | -0.5601788472 | 8.2447900500  |
| O  | 3.7042845059  | 2.7400044430  | 11.4796171470 |
| O  | 3.6717383090  | -0.6080154890 | 4.2334939360  |
| O  | 3.6717383090  | 2.6404330640  | 7.4819424890  |
| O  | 3.6990205151  | -0.6265273003 | 10.7974660682 |
| O  | 3.6651672276  | 2.6385576983  | 14.0588817620 |
| O  | 5.1512383090  | 3.9086290760  | 2.9652979240  |
| O  | 5.1512383090  | 0.6601805230  | 6.2137464770  |
| O  | 5.1388561254  | 3.9847662606  | 9.4750690462  |
| O  | 5.1375980725  | 0.6793748438  | 12.8916355856 |
| O  | 5.1512383090  | 1.3722370520  | 2.9652979240  |
| O  | 5.1512383090  | 4.6206856050  | 6.2137464770  |
| O  | 5.1405967007  | 1.3748906095  | 9.5622718769  |
| O  | 5.1467128507  | 4.7512496679  | 12.9861493467 |
| Ti | 6.6307383090  | 2.6404330640  | 2.9652979240  |
| Ti | 6.6307383090  | -0.6080154890 | 6.2137464770  |
| Ti | 6.6411336669  | 2.6066623382  | 9.6322855797  |
| Ti | 6.6486892490  | -0.5273478864 | 12.6279101477 |
| Ti | 8.1102383090  | -0.6080154890 | 2.9652979240  |
| Ti | 8.1102383090  | 2.6404330640  | 6.2137464770  |
| Ti | 8.1268767240  | -0.6440563909 | 9.4420479026  |
| Ti | 8.0516014744  | 2.7609555606  | 12.9726902909 |
| O  | 6.6307383090  | -0.6080154890 | 1.6971019120  |
| O  | 6.6307383090  | 2.6404330640  | 4.9455504650  |
| O  | 6.6564086708  | -0.5784326585 | 8.2526280196  |
| O  | 6.6226749198  | 2.7254205379  | 11.5016687794 |
| O  | 6.6307383090  | -0.6080154890 | 4.2334939360  |
| O  | 6.6307383090  | 2.6404330640  | 7.4819424890  |
| O  | 6.6210944076  | -0.5855710063 | 10.8281898992 |
| O  | 6.6126040224  | 2.7270599598  | 14.0608421964 |
| O  | 8.1102383090  | 3.9086290760  | 2.9652979240  |
| O  | 8.1102383090  | 0.6601805230  | 6.2137464770  |
| O  | 8.0953128748  | 3.9814914694  | 9.4781374396  |
| O  | 8.0958985674  | 0.6875544899  | 12.9819341760 |
| O  | 8.1102383090  | 1.3722370520  | 2.9652979240  |
| O  | 8.1102383090  | 4.6206856050  | 6.2137464770  |
| O  | 8.0947092629  | 1.3732827679  | 9.5641679571  |
| O  | 8.0993989567  | 4.7584884181  | 12.9006869425 |
| Ti | 9.5897383090  | 2.6404330640  | 2.9652979240  |
| Ti | 9.5897383090  | -0.6080154890 | 6.2137464770  |
| Ti | 9.6088195667  | 2.6403320425  | 9.6162758112  |
| Ti | 9.6078384773  | -0.5048510657 | 12.6305972734 |
| Ti | 11.0692383090 | -0.6080154890 | 2.9652979240  |
| Ti | 11.0692383090 | 2.6404330640  | 6.2137464770  |
| Ti | 11.0812997188 | -0.6358427802 | 9.4333253203  |
| Ti | 11.0081612772 | 2.6831597370  | 12.9533790998 |
| O  | 9.5897383090  | -0.6080154890 | 1.6971019120  |

|    |               |               |               |
|----|---------------|---------------|---------------|
| O  | 9.5897383090  | 2.6404330640  | 4.9455504650  |
| O  | 9.5866529477  | -0.5897837551 | 8.2662045288  |
| O  | 9.6160978339  | 2.6638941423  | 11.4796916042 |
| O  | 9.5897383090  | -0.6080154890 | 4.2334939360  |
| O  | 9.5897383090  | 2.6404330640  | 7.4819424890  |
| O  | 9.5775369492  | -0.5773031965 | 10.8318114091 |
| O  | 9.5709534641  | 2.7278724234  | 14.0531604059 |
| O  | 11.0692383090 | 3.9086290760  | 2.9652979240  |
| O  | 11.0692383090 | 0.6601805230  | 6.2137464770  |
| O  | 11.0479109680 | 3.9844955191  | 9.4726555699  |
| O  | 11.1303128502 | 0.6803517168  | 12.9846104289 |
| O  | 11.0692383090 | 1.3722370520  | 2.9652979240  |
| O  | 11.0692383090 | 4.6206856050  | 6.2137464770  |
| O  | 11.0537176317 | 1.3708691538  | 9.4785700241  |
| O  | 11.0421976397 | 4.7589208537  | 12.9830577200 |
| Ti | 12.5487383090 | 2.6404330640  | 2.9652979240  |
| Ti | 12.5487383090 | -0.6080154890 | 6.2137464770  |
| Ti | 12.5720990368 | 2.6195826636  | 9.6237853450  |
| Ti | 12.5671346782 | -0.6109605493 | 12.6320045797 |
| Ti | 14.0282383090 | -0.6080154890 | 2.9652979240  |
| Ti | 14.0282383090 | 2.6404330640  | 6.2137464770  |
| Ti | 14.0418611279 | -0.6240205957 | 9.4430956365  |
| Ti | 14.0561261413 | 2.6716098391  | 12.9461138251 |
| O  | 12.5487383090 | -0.6080154890 | 1.6971019120  |
| O  | 12.5487383090 | 2.6404330640  | 4.9455504650  |
| O  | 12.5506675937 | -0.5917751210 | 8.2653373550  |
| O  | 12.5315454105 | 2.7244730146  | 11.4480532901 |
| O  | 12.5487383090 | -0.6080154890 | 4.2334939360  |
| O  | 12.5487383090 | 2.6404330640  | 7.4819424890  |
| O  | 12.5338691328 | -0.5824933514 | 10.8317813058 |
| O  | 12.5362087554 | 2.7404499057  | 14.0581950853 |
| O  | 14.0282383090 | 3.9086290760  | 2.9652979240  |
| O  | 14.0282383090 | 0.6601805230  | 6.2137464770  |
| O  | 14.0770495205 | 3.9567329881  | 9.4939198440  |
| O  | 14.0130358934 | 0.6792262012  | 12.9811634210 |
| O  | 14.0282383090 | 1.3722370520  | 2.9652979240  |
| O  | 14.0282383090 | 4.6206856050  | 6.2137464770  |
| O  | 14.0175869208 | 1.3675163697  | 9.5633919175  |
| O  | 14.0914172595 | 4.6894005768  | 12.8811230631 |
| Ti | 15.5077383090 | 2.6404330640  | 2.9652979240  |
| Ti | 15.5077383090 | -0.6080154890 | 6.2137464770  |
| Ti | 15.5339697511 | 2.6731008597  | 9.6402326999  |
| Ti | 15.5260792395 | -0.5247168046 | 12.6346423220 |
| Ti | 16.9872383090 | -0.6080154890 | 2.9652979240  |
| Ti | 16.9872383090 | 2.6404330640  | 6.2137464770  |
| Ti | 17.0082883148 | -0.5281882094 | 9.4273629356  |
| Ti | 17.0198999986 | 2.6958835873  | 13.0126449860 |
| O  | 15.5077383090 | -0.6080154890 | 1.6971019120  |
| O  | 15.5077383090 | 2.6404330640  | 4.9455504650  |
| O  | 15.5019922488 | -0.5804614729 | 8.2713257135  |
| O  | 15.5670672253 | 2.6355434729  | 11.5095065112 |
| O  | 15.5077383090 | -0.6080154890 | 4.2334939360  |
| O  | 15.5077383090 | 2.6404330640  | 7.4819424890  |
| O  | 15.4994645298 | -0.5817025793 | 10.8332395322 |
| O  | 15.4915105755 | 2.7219600809  | 14.0613558913 |
| O  | 16.9872383090 | 3.9086290760  | 2.9652979240  |
| O  | 16.9872383090 | 0.6601805230  | 6.2137464770  |
| O  | 16.9801256930 | 3.9727976068  | 9.4789939641  |
| O  | 17.0479704725 | 0.6767919143  | 12.9814776235 |
| O  | 16.9872383090 | 1.3722370520  | 2.9652979240  |
| O  | 16.9872383090 | 4.6206856050  | 6.2137464770  |
| O  | 17.0440846661 | 1.3665567972  | 9.5585300246  |
| O  | 17.0445986563 | 4.6951137506  | 12.9811310775 |
| Ti | 0.7127383090  | 9.1373301700  | 2.9652979240  |

|    |              |               |               |
|----|--------------|---------------|---------------|
| Ti | 0.7127383090 | 5.8888816170  | 6.2137464770  |
| Ti | 0.7350269301 | 9.2136114091  | 9.6454024451  |
| Ti | 0.7317487136 | 5.8975656724  | 12.6163217617 |
| Ti | 2.1922383090 | 5.8888816170  | 2.9652979240  |
| Ti | 2.1922383090 | 9.1373301700  | 6.2137464770  |
| Ti | 2.2081705372 | 5.9862745041  | 9.4252950356  |
| Ti | 2.1746916978 | 9.1320936515  | 12.9863066265 |
| O  | 0.7127383090 | 5.8888816170  | 1.6971019120  |
| O  | 0.7127383090 | 9.1373301700  | 4.9455504650  |
| O  | 0.7325031925 | 5.9390066786  | 8.2459337052  |
| O  | 0.7024202535 | 9.1724007961  | 11.5130795978 |
| O  | 0.7127383090 | 5.8888816170  | 4.2334939360  |
| O  | 0.7127383090 | 9.1373301700  | 7.4819424890  |
| O  | 0.7428302584 | 5.9146299556  | 10.8038159642 |
| O  | 0.6931821790 | 9.1622792284  | 14.0658226219 |
| O  | 2.1922383090 | 10.4055261820 | 2.9652979240  |
| O  | 2.1922383090 | 7.1570776290  | 6.2137464770  |
| O  | 2.1854713878 | 10.5085757858 | 9.5565378906  |
| O  | 2.1865649113 | 7.1372491590  | 12.9822372017 |
| O  | 2.1922383090 | 7.8691341580  | 2.9652979240  |
| O  | 2.1922383090 | 11.1175827100 | 6.2137464770  |
| O  | 2.1863820126 | 7.8986721134  | 9.5609240276  |
| O  | 2.1753421364 | 11.2084203650 | 12.9843532079 |
| Ti | 3.6717383090 | 9.1373301700  | 2.9652979240  |
| Ti | 3.6717383090 | 5.8888816170  | 6.2137464770  |
| Ti | 3.6986372689 | 9.2015583564  | 9.6464731301  |
| Ti | 3.6842435454 | 5.9277273531  | 12.6314398491 |
| Ti | 5.1512383090 | 5.8888816170  | 2.9652979240  |
| Ti | 5.1512383090 | 9.1373301700  | 6.2137464770  |
| Ti | 5.1611992796 | 5.8906184476  | 9.4312450344  |
| Ti | 5.1101545880 | 9.1999128888  | 12.9870068096 |
| O  | 3.6717383090 | 5.8888816170  | 1.6971019120  |
| O  | 3.6717383090 | 9.1373301700  | 4.9455504650  |
| O  | 3.6813769111 | 5.9476462924  | 8.2486069160  |
| O  | 3.6533567944 | 9.2518437636  | 11.5145915339 |
| O  | 3.6717383090 | 5.8888816170  | 4.2334939360  |
| O  | 3.6717383090 | 9.1373301700  | 7.4819424890  |
| O  | 3.6614756995 | 5.9409531411  | 10.8264950132 |
| O  | 3.6475090535 | 9.1631152783  | 14.0688685696 |
| O  | 5.1512383090 | 10.4055261820 | 2.9652979240  |
| O  | 5.1512383090 | 7.1570776290  | 6.2137464770  |
| O  | 5.1413819650 | 10.4607368545 | 9.4821566303  |
| O  | 5.1341082233 | 7.1968765709  | 12.9795786800 |
| O  | 5.1512383090 | 7.8691341580  | 2.9652979240  |
| O  | 5.1512383090 | 11.1175827100 | 6.2137464770  |
| O  | 5.1295444592 | 7.8932992222  | 9.5666322800  |
| O  | 5.1316914811 | 11.2147094103 | 12.9846366650 |
| Ti | 6.6307383090 | 9.1373301700  | 2.9652979240  |
| Ti | 6.6307383090 | 5.8888816170  | 6.2137464770  |
| Ti | 6.6333166125 | 9.1160995548  | 9.6459555962  |
| Ti | 6.6274875887 | 5.9873147671  | 12.6267170534 |
| Ti | 8.1102383090 | 5.8888816170  | 2.9652979240  |
| Ti | 8.1102383090 | 9.1373301700  | 6.2137464770  |
| Ti | 8.1242663959 | 5.8702718421  | 9.4255031762  |
| Ti | 8.0514635856 | 9.2151762977  | 12.9866443006 |
| O  | 6.6307383090 | 5.8888816170  | 1.6971019120  |
| O  | 6.6307383090 | 9.1373301700  | 4.9455504650  |
| O  | 6.6293263900 | 5.9486483217  | 8.2577430915  |
| O  | 6.6112853990 | 9.1636558825  | 11.5172482495 |
| O  | 6.6307383090 | 5.8888816170  | 4.2334939360  |
| O  | 6.6307383090 | 9.1373301700  | 7.4819424890  |
| O  | 6.6131645531 | 5.9442570742  | 10.8283957440 |
| O  | 6.6065374722 | 9.2530960981  | 14.0681519192 |
| O  | 8.1102383090 | 10.4055261820 | 2.9652979240  |

|    |               |               |               |
|----|---------------|---------------|---------------|
| O  | 8.1102383090  | 7.1570776290  | 6.2137464770  |
| O  | 8.0947399170  | 10.4374513636 | 9.5610937235  |
| O  | 8.0923730876  | 7.1973917843  | 12.9850171797 |
| O  | 8.1102383090  | 7.8691341580  | 2.9652979240  |
| O  | 8.1102383090  | 11.1175827100 | 6.2137464770  |
| O  | 8.0944530076  | 7.8852237967  | 9.5621242286  |
| O  | 8.1006417554  | 11.2164254755 | 12.9812114283 |
| Ti | 9.5897383090  | 9.1373301700  | 2.9652979240  |
| Ti | 9.5897383090  | 5.8888816170  | 6.2137464770  |
| Ti | 9.6011850339  | 9.1077469056  | 9.6475179164  |
| Ti | 9.6079637239  | 6.0054456210  | 12.6153692622 |
| Ti | 11.0692383090 | 5.8888816170  | 2.9652979240  |
| Ti | 11.0692383090 | 9.1373301700  | 6.2137464770  |
| Ti | 11.1020923729 | 5.8745248054  | 9.4175040702  |
| Ti | 11.0066480305 | 9.1951249501  | 12.9753476766 |
| O  | 9.5897383090  | 5.8888816170  | 1.6971019120  |
| O  | 9.5897383090  | 9.1373301700  | 4.9455504650  |
| O  | 9.5899102785  | 5.9472171858  | 8.2556938863  |
| O  | 9.5781454313  | 9.1657594220  | 11.5122589154 |
| O  | 9.5897383090  | 5.8888816170  | 4.2334939360  |
| O  | 9.5897383090  | 9.1373301700  | 7.4819424890  |
| O  | 9.5764224839  | 5.9434015197  | 10.8252077556 |
| O  | 9.5759628792  | 9.1627847210  | 14.0635801248 |
| O  | 11.0692383090 | 10.4055261820 | 2.9652979240  |
| O  | 11.0692383090 | 7.1570776290  | 6.2137464770  |
| O  | 11.0531172137 | 10.4351802877 | 9.4766652096  |
| O  | 11.1286021707 | 7.1972951906  | 12.8876256394 |
| O  | 11.0692383090 | 7.8691341580  | 2.9652979240  |
| O  | 11.0692383090 | 11.1175827100 | 6.2137464770  |
| O  | 11.0697489434 | 7.8776140517  | 9.5642826289  |
| O  | 11.0539276494 | 11.2114910300 | 12.9835167626 |
| Ti | 12.5487383090 | 9.1373301700  | 2.9652979240  |
| Ti | 12.5487383090 | 5.8888816170  | 6.2137464770  |
| Ti | 12.5844155610 | 9.1215762884  | 9.6248066258  |
| Ti | 12.5786910695 | 5.8889374023  | 12.6478075755 |
| Ti | 14.0282383090 | 5.8888816170  | 2.9652979240  |
| Ti | 14.0282383090 | 9.1373301700  | 6.2137464770  |
| Ti | 14.0646607960 | 5.8944863656  | 9.4866005699  |
| Ti | 14.0296120040 | 9.1976089405  | 12.9415636349 |
| O  | 12.5487383090 | 5.8888816170  | 1.6971019120  |
| O  | 12.5487383090 | 9.1373301700  | 4.9455504650  |
| O  | 12.6006345977 | 5.9432386329  | 8.2785355411  |
| O  | 12.6076364443 | 9.2563744944  | 11.4464091579 |
| O  | 12.5487383090 | 5.8888816170  | 4.2334939360  |
| O  | 12.5487383090 | 9.1373301700  | 7.4819424890  |
| O  | 12.5345792910 | 5.8526384058  | 10.8293449369 |
| O  | 12.5443414910 | 9.1582102246  | 14.0546552671 |
| O  | 14.0282383090 | 10.4055261820 | 2.9652979240  |
| O  | 14.0282383090 | 7.1570776290  | 6.2137464770  |
| O  | 14.0832799927 | 10.4546011420 | 9.4696390340  |
| O  | 14.0399624765 | 7.1630097124  | 12.8666443525 |
| O  | 14.0282383090 | 7.8691341580  | 2.9652979240  |
| O  | 14.0282383090 | 11.1175827100 | 6.2137464770  |
| O  | 14.0830999673 | 7.8804775013  | 9.5650787812  |
| O  | 14.0929410038 | 11.2051824296 | 12.8963945416 |
| Ti | 15.5077383090 | 9.1373301700  | 2.9652979240  |
| Ti | 15.5077383090 | 5.8888816170  | 6.2137464770  |
| Ti | 15.5304814660 | 9.1963479780  | 9.6281871592  |
| Ti | 15.5426096291 | 5.9780903125  | 12.6648740800 |
| Ti | 16.9872383090 | 5.8888816170  | 2.9652979240  |
| Ti | 16.9872383090 | 9.1373301700  | 6.2137464770  |
| Ti | 17.0054080691 | 5.9890474742  | 9.4265024036  |
| Ti | 16.9903251664 | 9.2053857867  | 12.9559838704 |
| O  | 15.5077383090 | 5.8888816170  | 1.6971019120  |

|    |               |               |               |
|----|---------------|---------------|---------------|
| O  | 15.5077383090 | 9.1373301700  | 4.9455504650  |
| O  | 15.5115869737 | 5.9428478296  | 8.2706117220  |
| O  | 15.5461715864 | 9.1851407712  | 11.4835287884 |
| O  | 15.5077383090 | 5.8888816170  | 4.2334939360  |
| O  | 15.5077383090 | 9.1373301700  | 7.4819424890  |
| O  | 15.5754862970 | 5.9395274569  | 10.8339022471 |
| O  | 15.4913263327 | 9.1614355969  | 14.0555732636 |
| O  | 16.9872383090 | 10.4055261820 | 2.9652979240  |
| O  | 16.9872383090 | 7.1570776290  | 6.2137464770  |
| O  | 17.0204048273 | 10.4847349870 | 9.4898489820  |
| O  | 17.0328190454 | 7.1606969864  | 12.8977024378 |
| O  | 16.9872383090 | 7.8691341580  | 2.9652979240  |
| O  | 16.9872383090 | 11.1175827100 | 6.2137464770  |
| O  | 17.0430371321 | 7.8911788624  | 9.5555979942  |
| O  | 16.9723737256 | 11.2193463708 | 12.9819167915 |
| Ti | 0.7127383090  | 15.6342272750 | 2.9652979240  |
| Ti | 0.7127383090  | 12.3857787220 | 6.2137464770  |
| Ti | 0.7397417113  | 15.7440045193 | 9.6349490214  |
| Ti | 0.7184983286  | 12.4132615276 | 12.6328617198 |
| Ti | 2.1922383090  | 12.3857787220 | 2.9652979240  |
| Ti | 2.1922383090  | 15.6342272750 | 6.2137464770  |
| Ti | 2.2105499005  | 12.4467875514 | 9.4384552081  |
| Ti | 2.1999922482  | 15.6636185886 | 12.9851352645 |
| O  | 0.7127383090  | 12.3857787220 | 1.6971019120  |
| O  | 0.7127383090  | 15.6342272750 | 4.9455504650  |
| O  | 0.7423479508  | 12.4459171144 | 8.2504666442  |
| O  | 0.7002108971  | 15.7807923785 | 11.5075949226 |
| O  | 0.7127383090  | 12.3857787220 | 4.2334939360  |
| O  | 0.7127383090  | 15.6342272750 | 7.4819424890  |
| O  | 0.7027725403  | 12.4654612722 | 10.8302927789 |
| O  | 0.7018747895  | 15.6889202122 | 14.0617471065 |
| O  | 2.1922383090  | 16.9024232870 | 2.9652979240  |
| O  | 2.1922383090  | 13.6539747350 | 6.2137464770  |
| O  | 2.2537626781  | 16.9579641068 | 9.4765690412  |
| O  | 2.1805637545  | 13.6557041468 | 12.9839681278 |
| O  | 2.1922383090  | 14.3660312630 | 2.9652979240  |
| O  | 2.1922383090  | 17.6144798160 | 6.2137464770  |
| O  | 2.1776202607  | 14.4103925863 | 9.5671128043  |
| O  | 2.1778361371  | 17.7303457778 | 12.9855140774 |
| Ti | 3.6717383090  | 15.6342272750 | 2.9652979240  |
| Ti | 3.6717383090  | 12.3857787220 | 6.2137464770  |
| Ti | 3.6827222290  | 15.6512305925 | 9.6454388520  |
| Ti | 3.6648217113  | 12.4187289644 | 12.6352103261 |
| Ti | 5.1512383090  | 12.3857787220 | 2.9652979240  |
| Ti | 5.1512383090  | 15.6342272750 | 6.2137464770  |
| Ti | 5.1702003596  | 12.4203556701 | 9.4280929418  |
| Ti | 5.1755718488  | 15.6600885191 | 13.0168479061 |
| O  | 3.6717383090  | 12.3857787220 | 1.6971019120  |
| O  | 3.6717383090  | 15.6342272750 | 4.9455504650  |
| O  | 3.6772381194  | 12.4527161019 | 8.2605082247  |
| O  | 3.7324626392  | 15.6894237029 | 11.5152900701 |
| O  | 3.6717383090  | 12.3857787220 | 4.2334939360  |
| O  | 3.6717383090  | 15.6342272750 | 7.4819424890  |
| O  | 3.6598249670  | 12.4677839481 | 10.8338904608 |
| O  | 3.6615433223  | 15.7729254740 | 14.0644684732 |
| O  | 5.1512383090  | 16.9024232870 | 2.9652979240  |
| O  | 5.1512383090  | 13.6539747350 | 6.2137464770  |
| O  | 5.1499478495  | 16.9528646938 | 9.4756287473  |
| O  | 5.1347583963  | 13.6511870313 | 12.9887521651 |
| O  | 5.1512383090  | 14.3660312630 | 2.9652979240  |
| O  | 5.1512383090  | 17.6144798160 | 6.2137464770  |
| O  | 5.1794512672  | 14.3634026948 | 9.5395187595  |
| O  | 5.2156785083  | 17.7285844334 | 12.9889922482 |
| Ti | 6.6307383090  | 15.6342272750 | 2.9652979240  |



|    |               |               |               |
|----|---------------|---------------|---------------|
| Ti | 6.6307383090  | 12.3857787220 | 6.2137464770  |
| Ti | 6.6530271658  | 15.6346946227 | 9.6833345092  |
| Ti | 6.6362945168  | 12.4208272171 | 12.6393238287 |
| Ti | 8.1102383090  | 12.3857787220 | 2.9652979240  |
| Ti | 8.1102383090  | 15.6342272750 | 6.2137464770  |
| Ti | 8.1188022528  | 12.3305448471 | 9.4433006024  |
| Ti | 8.1531561490  | 15.7335155298 | 13.0052874796 |
| O  | 6.6307383090  | 12.3857787220 | 1.6971019120  |
| O  | 6.6307383090  | 15.6342272750 | 4.9455504650  |
| O  | 6.6417337119  | 12.3939968654 | 8.2585483781  |
| O  | 6.6150005234  | 15.6901020735 | 11.5229019222 |
| O  | 6.6307383090  | 12.3857787220 | 4.2334939360  |
| O  | 6.6307383090  | 15.6342272750 | 7.4819424890  |
| O  | 6.6112763604  | 12.3787711552 | 10.8363031742 |
| O  | 6.6833903321  | 15.6878023878 | 14.0738329198 |
| O  | 8.1102383090  | 16.9024232870 | 2.9652979240  |
| O  | 8.1102383090  | 13.6539747350 | 6.2137464770  |
| O  | 8.1012037717  | 16.9502358216 | 9.5617607126  |
| O  | 8.0956645550  | 13.6486313148 | 12.9834280619 |
| O  | 8.1102383090  | 14.3660312630 | 2.9652979240  |
| O  | 8.1102383090  | 17.6144798160 | 6.2137464770  |
| O  | 8.0941825204  | 14.3381259983 | 9.5646202723  |
| O  | 8.1731244897  | 17.7331705552 | 12.9829940687 |
| Ti | 9.5897383090  | 15.6342272750 | 2.9652979240  |
| Ti | 9.5897383090  | 12.3857787220 | 6.2137464770  |
| Ti | 9.6044254043  | 15.5658212811 | 9.6503068964  |
| Ti | 9.5978952078  | 12.4953851723 | 12.6296628218 |
| Ti | 11.0692383090 | 12.3857787220 | 2.9652979240  |
| Ti | 11.0692383090 | 15.6342272750 | 6.2137464770  |
| Ti | 11.0841092251 | 12.3270871948 | 9.4213422639  |
| Ti | 11.0994919255 | 15.6581085046 | 12.9535746826 |
| O  | 9.5897383090  | 12.3857787220 | 1.6971019120  |
| O  | 9.5897383090  | 15.6342272750 | 4.9455504650  |
| O  | 9.5805270601  | 12.3828211695 | 8.2712558504  |
| O  | 9.5716648515  | 15.5987444149 | 11.5108751356 |
| O  | 9.5897383090  | 12.3857787220 | 4.2334939360  |
| O  | 9.5897383090  | 15.6342272750 | 7.4819424890  |
| O  | 9.5756434090  | 12.3780355655 | 10.8364777054 |
| O  | 9.6501318282  | 15.6861043040 | 14.0625331998 |
| O  | 11.0692383090 | 16.9024232870 | 2.9652979240  |
| O  | 11.0692383090 | 13.6539747350 | 6.2137464770  |
| O  | 11.0510050448 | 16.9473587914 | 9.5612232993  |
| O  | 11.1342566331 | 13.6432972921 | 12.8920494770 |
| O  | 11.0692383090 | 14.3660312630 | 2.9652979240  |
| O  | 11.0692383090 | 17.6144798160 | 6.2137464770  |
| O  | 11.0571792484 | 14.3334765963 | 9.5626246939  |
| O  | 11.0565597161 | 17.7221141754 | 12.8982802280 |
| Ti | 12.5487383090 | 15.6342272750 | 2.9652979240  |
| Ti | 12.5487383090 | 12.3857787220 | 6.2137464770  |
| Ti | 12.5620453978 | 15.6339774355 | 9.6346266767  |
| Ti | 12.5728743882 | 12.3426330400 | 12.5848821107 |
| Ti | 14.0282383090 | 12.3857787220 | 2.9652979240  |
| Ti | 14.0282383090 | 15.6342272750 | 6.2137464770  |
| Ti | 14.0529065202 | 12.4124288248 | 9.3905623524  |
| Ti | 14.0469303127 | 15.6566133353 | 12.9877578906 |
| O  | 12.5487383090 | 12.3857787220 | 1.6971019120  |
| O  | 12.5487383090 | 15.6342272750 | 4.9455504650  |
| O  | 12.5378101531 | 12.3813908330 | 8.2314865562  |
| O  | 12.5801003811 | 15.6656694030 | 11.4796508021 |
| O  | 12.5487383090 | 12.3857787220 | 4.2334939360  |
| O  | 12.5487383090 | 15.6342272750 | 7.4819424890  |
| O  | 12.5875936956 | 12.3703646162 | 10.7838964543 |
| O  | 12.5406500221 | 15.6927372713 | 14.0562394040 |
| O  | 14.0282383090 | 16.9024232870 | 2.9652979240  |

|    |               |               |               |
|----|---------------|---------------|---------------|
| O  | 14.0282383090 | 13.6539747350 | 6.2137464770  |
| O  | 14.0130203810 | 16.9526233514 | 9.5582434782  |
| O  | 14.0121507902 | 13.6389582876 | 12.9805602128 |
| O  | 14.0282383090 | 14.3660312630 | 2.9652979240  |
| O  | 14.0282383090 | 17.6144798160 | 6.2137464770  |
| O  | 14.0160327520 | 14.3442755347 | 9.4776725156  |
| O  | 14.0813212423 | 17.7273166867 | 12.9823103965 |
| Ti | 15.5077383090 | 15.6342272750 | 2.9652979240  |
| Ti | 15.5077383090 | 12.3857787220 | 6.2137464770  |
| Ti | 15.5443099829 | 15.6515009619 | 9.6373120688  |
| Ti | 15.5342071550 | 12.5072162254 | 12.5919133665 |
| Ti | 16.9872383090 | 12.3857787220 | 2.9652979240  |
| Ti | 16.9872383090 | 15.6342272750 | 6.2137464770  |
| Ti | 17.0188606598 | 12.4452413845 | 9.4230466660  |
| Ti | 17.0020414914 | 15.7357447401 | 12.9771770812 |
| O  | 15.5077383090 | 12.3857787220 | 1.6971019120  |
| O  | 15.5077383090 | 15.6342272750 | 4.9455504650  |
| O  | 15.5433676363 | 12.4371242052 | 8.2418823928  |
| O  | 15.4919424600 | 15.6816925050 | 11.4997352608 |
| O  | 15.5077383090 | 12.3857787220 | 4.2334939360  |
| O  | 15.5077383090 | 15.6342272750 | 7.4819424890  |
| O  | 15.5284263428 | 12.4476611630 | 10.7887856937 |
| O  | 15.4986097082 | 15.6868671238 | 14.0623691053 |
| O  | 16.9872383090 | 16.9024232870 | 2.9652979240  |
| O  | 16.9872383090 | 13.6539747350 | 6.2137464770  |
| O  | 16.9656329997 | 16.9567077551 | 9.4750934937  |
| O  | 17.0101565289 | 13.6804670724 | 12.9243254659 |
| O  | 16.9872383090 | 14.3660312630 | 2.9652979240  |
| O  | 16.9872383090 | 17.6144798160 | 6.2137464770  |
| O  | 17.0191748050 | 14.3899992811 | 9.5451802032  |
| O  | 16.9726797662 | 17.7369265878 | 12.9840616650 |
| Au | 14.8087504795 | 4.6559008357  | 19.9826611806 |
| Au | 14.2046392130 | 8.9342947222  | 21.1643041675 |
| Au | 17.6399016780 | 6.9807563968  | 16.2974509983 |
| Au | 12.7969286897 | 7.3777700880  | 15.9385345363 |
| Au | 14.6515748113 | 3.4323840376  | 17.5112524255 |
| Au | 12.7919202074 | 6.5370472457  | 20.6907134410 |
| Au | 17.7471446817 | 9.2659421152  | 17.9501963139 |
| Au | 16.9699913340 | 4.8583945316  | 18.0392507059 |
| Au | 15.2787709624 | 8.5958357158  | 16.6417161937 |
| Au | 16.8126458536 | 8.1525154930  | 20.3768571660 |
| Au | 15.2067850975 | 5.8037075792  | 15.9563623927 |
| Au | 13.1789522047 | 8.3938559265  | 18.5524765116 |
| Au | 17.4381762177 | 5.3578975687  | 20.7725171257 |
| Au | 12.7432040686 | 4.4660117684  | 15.6437524685 |
| Au | 12.8536068352 | 5.6098508989  | 18.1222329454 |
| Au | 15.3334263219 | 10.1640898953 | 18.9649488174 |
| Au | 18.8143632786 | 6.8348888035  | 18.8653466859 |
| Au | 15.2675956924 | 6.4943279773  | 22.0605826634 |

(2) The optimized structure obtained from the second BOMD simulation of the soft-landing of Au<sub>18</sub> onto TiO<sub>2</sub>(110) surface

|    |              |               |               |
|----|--------------|---------------|---------------|
| Ti | 0.7127383090 | 2.6404330640  | 2.9652979240  |
| Ti | 0.7127383090 | -0.6080154890 | 6.2137464770  |
| Ti | 0.7249055339 | 2.5664054620  | 9.6893302997  |
| Ti | 0.7236199112 | -0.6636204219 | 12.6316547294 |

|    |              |               |               |
|----|--------------|---------------|---------------|
| Ti | 2.1922383090 | -0.6080154890 | 2.9652979240  |
| Ti | 2.1922383090 | 2.6404330640  | 6.2137464770  |
| Ti | 2.2042432029 | -0.7306743414 | 9.4283459451  |
| Ti | 2.2199717168 | 2.5849671926  | 13.0232067903 |
| O  | 0.7127383090 | -0.6080154890 | 1.6971019120  |
| O  | 0.7127383090 | 2.6404330640  | 4.9455504650  |
| O  | 0.7170966974 | -0.6669599251 | 8.2636132224  |
| O  | 0.6969169901 | 2.6256962286  | 11.5281351707 |
| O  | 0.7127383090 | -0.6080154890 | 4.2334939360  |
| O  | 0.7127383090 | 2.6404330640  | 7.4819424890  |
| O  | 0.6973667636 | -0.6787778341 | 10.8370252176 |
| O  | 0.7395787428 | 2.5662243721  | 14.1044919053 |
| O  | 2.1922383090 | 3.9086290760  | 2.9652979240  |
| O  | 2.1922383090 | 0.6601805230  | 6.2137464770  |
| O  | 2.1783652610 | 3.8903397856  | 9.5662023765  |
| O  | 2.1769060776 | 0.5743241108  | 12.9791591729 |
| O  | 2.1922383090 | 1.3722370520  | 2.9652979240  |
| O  | 2.1922383090 | 4.6206856050  | 6.2137464770  |
| O  | 2.1758646009 | 1.2831279299  | 9.5620546894  |
| O  | 2.1781243981 | 4.5852451348  | 12.9859818988 |
| Ti | 3.6717383090 | 2.6404330640  | 2.9652979240  |
| Ti | 3.6717383090 | -0.6080154890 | 6.2137464770  |
| Ti | 3.6889837178 | 2.5037637060  | 9.6303167801  |
| Ti | 3.6998985133 | -0.6173894385 | 12.5833977622 |
| Ti | 5.1512383090 | -0.6080154890 | 2.9652979240  |
| Ti | 5.1512383090 | 2.6404330640  | 6.2137464770  |
| Ti | 5.1665932753 | -0.7310576141 | 9.3856464565  |
| Ti | 5.1777413558 | 2.5796260862  | 12.9541457812 |
| O  | 3.6717383090 | -0.6080154890 | 1.6971019120  |
| O  | 3.6717383090 | 2.6404330640  | 4.9455504650  |
| O  | 3.6545936726 | -0.6791946995 | 8.2281645392  |
| O  | 3.7320019104 | 2.5394915766  | 11.5094982538 |
| O  | 3.6717383090 | -0.6080154890 | 4.2334939360  |
| O  | 3.6717383090 | 2.6404330640  | 7.4819424890  |
| O  | 3.6974491414 | -0.6134740804 | 10.7868989106 |
| O  | 3.7291524386 | 2.5409619916  | 14.0690494184 |
| O  | 5.1512383090 | 3.9086290760  | 2.9652979240  |
| O  | 5.1512383090 | 0.6601805230  | 6.2137464770  |
| O  | 5.1367730469 | 3.8894522316  | 9.4790483184  |
| O  | 5.2131623861 | 0.5562388175  | 12.9745127321 |
| O  | 5.1512383090 | 1.3722370520  | 2.9652979240  |
| O  | 5.1512383090 | 4.6206856050  | 6.2137464770  |
| O  | 5.1377880808 | 1.2845663588  | 9.4676084054  |
| O  | 5.1437851581 | 4.5846491835  | 12.9777749003 |
| Ti | 6.6307383090 | 2.6404330640  | 2.9652979240  |
| Ti | 6.6307383090 | -0.6080154890 | 6.2137464770  |
| Ti | 6.6563272917 | 2.5665538489  | 9.6007260716  |
| Ti | 6.6464675748 | -0.6823487493 | 12.5598294440 |
| Ti | 8.1102383090 | -0.6080154890 | 2.9652979240  |
| Ti | 8.1102383090 | 2.6404330640  | 6.2137464770  |
| Ti | 8.1323763899 | -0.6318417479 | 9.4147834752  |
| Ti | 8.1316662210 | 2.5040974864  | 12.9094575965 |
| O  | 6.6307383090 | -0.6080154890 | 1.6971019120  |
| O  | 6.6307383090 | 2.6404330640  | 4.9455504650  |
| O  | 6.6487194963 | -0.6719887549 | 8.2339223399  |
| O  | 6.6198913797 | 2.5356498962  | 11.4472938804 |
| O  | 6.6307383090 | -0.6080154890 | 4.2334939360  |
| O  | 6.6307383090 | 2.6404330640  | 7.4819424890  |
| O  | 6.6183627435 | -0.5922054558 | 10.7572688433 |
| O  | 6.6974546195 | 2.5381485614  | 14.0529704982 |
| O  | 8.1102383090 | 3.9086290760  | 2.9652979240  |
| O  | 8.1102383090 | 0.6601805230  | 6.2137464770  |
| O  | 8.0973256503 | 3.8926707261  | 9.5666969727  |
| O  | 8.1637865988 | 0.5058896648  | 12.8896443597 |

|    |               |               |               |
|----|---------------|---------------|---------------|
| O  | 8.1102383090  | 1.3722370520  | 2.9652979240  |
| O  | 8.1102383090  | 4.6206856050  | 6.2137464770  |
| O  | 8.1567832711  | 1.2958588113  | 9.4750494254  |
| O  | 8.0952438490  | 4.5747244589  | 12.8857922223 |
| Ti | 9.5897383090  | 2.6404330640  | 2.9652979240  |
| Ti | 9.5897383090  | -0.6080154890 | 6.2137464770  |
| Ti | 9.6192839349  | 2.6679415653  | 9.6172191856  |
| Ti | 9.6202878440  | -0.7472523063 | 12.5569205669 |
| Ti | 11.0692383090 | -0.6080154890 | 2.9652979240  |
| Ti | 11.0692383090 | 2.6404330640  | 6.2137464770  |
| Ti | 11.0980895285 | -0.6241414127 | 9.3580307110  |
| Ti | 11.1145047766 | 2.5569777017  | 12.9408694117 |
| O  | 9.5897383090  | -0.6080154890 | 1.6971019120  |
| O  | 9.5897383090  | 2.6404330640  | 4.9455504650  |
| O  | 9.5776147170  | -0.6801997489 | 8.2156697299  |
| O  | 9.6214508628  | 2.5701475641  | 11.4760440904 |
| O  | 9.5897383090  | -0.6080154890 | 4.2334939360  |
| O  | 9.5897383090  | 2.6404330640  | 7.4819424890  |
| O  | 9.6520005542  | -0.6802893971 | 10.7537593536 |
| O  | 9.5774491510  | 2.5337109783  | 14.0599873053 |
| O  | 11.0692383090 | 3.9086290760  | 2.9652979240  |
| O  | 11.0692383090 | 0.6601805230  | 6.2137464770  |
| O  | 11.1250767678 | 3.8900744514  | 9.5585076983  |
| O  | 11.0513392236 | 0.5066705044  | 12.9783549184 |
| O  | 11.0692383090 | 1.3722370520  | 2.9652979240  |
| O  | 11.0692383090 | 4.6206856050  | 6.2137464770  |
| O  | 11.0639365383 | 1.2887129502  | 9.4679695578  |
| O  | 11.1219152850 | 4.5756598623  | 12.9818801984 |
| Ti | 12.5487383090 | 2.6404330640  | 2.9652979240  |
| Ti | 12.5487383090 | -0.6080154890 | 6.2137464770  |
| Ti | 12.5636606779 | 2.5864201813  | 9.6286135457  |
| Ti | 12.5590147180 | -0.6354627871 | 12.5875477268 |
| Ti | 14.0282383090 | -0.6080154890 | 2.9652979240  |
| Ti | 14.0282383090 | 2.6404330640  | 6.2137464770  |
| Ti | 14.0578666052 | -0.6467388405 | 9.4269025341  |
| Ti | 14.0532599160 | 2.5797409755  | 13.0196426115 |
| O  | 12.5487383090 | -0.6080154890 | 1.6971019120  |
| O  | 12.5487383090 | 2.6404330640  | 4.9455504650  |
| O  | 12.6063828625 | -0.6734804732 | 8.2216978703  |
| O  | 12.5323154035 | 2.5330965105  | 11.5127989063 |
| O  | 12.5487383090 | -0.6080154890 | 4.2334939360  |
| O  | 12.5487383090 | 2.6404330640  | 7.4819424890  |
| O  | 12.5658746242 | -0.6143396787 | 10.7832365847 |
| O  | 12.5308456807 | 2.5357114098  | 14.0673081117 |
| O  | 14.0282383090 | 3.9086290760  | 2.9652979240  |
| O  | 14.0282383090 | 0.6601805230  | 6.2137464770  |
| O  | 14.0130178547 | 3.8899423202  | 9.5660298967  |
| O  | 14.0181729963 | 0.5727263161  | 12.9826468355 |
| O  | 14.0282383090 | 1.3722370520  | 2.9652979240  |
| O  | 14.0282383090 | 4.6206856050  | 6.2137464770  |
| O  | 14.0472238685 | 1.3032254886  | 9.4853159756  |
| O  | 14.0133722445 | 4.5833517787  | 12.9845004976 |
| Ti | 15.5077383090 | 2.6404330640  | 2.9652979240  |
| Ti | 15.5077383090 | -0.6080154890 | 6.2137464770  |
| Ti | 15.5333484516 | 2.5608682171  | 9.6831229989  |
| Ti | 15.5154351668 | -0.6476190953 | 12.6359589877 |
| Ti | 16.9872383090 | -0.6080154890 | 2.9652979240  |
| Ti | 16.9872383090 | 2.6404330640  | 6.2137464770  |
| Ti | 17.0009617843 | -0.7180196491 | 9.4360878166  |
| Ti | 17.0107761641 | 2.5807241847  | 13.0326483020 |
| O  | 15.5077383090 | -0.6080154890 | 1.6971019120  |
| O  | 15.5077383090 | 2.6404330640  | 4.9455504650  |
| O  | 15.5363344543 | -0.6551214585 | 8.2527048906  |
| O  | 15.4871128669 | 2.5385813226  | 11.5263010076 |

|    |               |               |               |
|----|---------------|---------------|---------------|
| O  | 15.5077383090 | -0.6080154890 | 4.2334939360  |
| O  | 15.5077383090 | 2.6404330640  | 7.4819424890  |
| O  | 15.4939108447 | -0.6768386414 | 10.8349674904 |
| O  | 15.5181864754 | 2.5945687306  | 14.1055132274 |
| O  | 16.9872383090 | 3.9086290760  | 2.9652979240  |
| O  | 16.9872383090 | 0.6601805230  | 6.2137464770  |
| O  | 16.9727519515 | 3.8902290998  | 9.5641632209  |
| O  | 16.9781691088 | 0.5755001120  | 12.9802645967 |
| O  | 16.9872383090 | 1.3722370520  | 2.9652979240  |
| O  | 16.9872383090 | 4.6206856050  | 6.2137464770  |
| O  | 16.9800524949 | 1.2864038843  | 9.5628575965  |
| O  | 16.9701652025 | 4.5846565049  | 12.9854561575 |
| Ti | 0.7127383090  | 9.1373301700  | 2.9652979240  |
| Ti | 0.7127383090  | 5.8888816170  | 6.2137464770  |
| Ti | 0.7228601481  | 9.1013022154  | 9.6293874048  |
| Ti | 0.7159859923  | 5.8178885519  | 12.6316947672 |
| Ti | 2.1922383090  | 5.8888816170  | 2.9652979240  |
| Ti | 2.1922383090  | 9.1373301700  | 6.2137464770  |
| Ti | 2.2086029869  | 5.7832022822  | 9.4478484541  |
| Ti | 2.1193491788  | 9.0951699857  | 12.9567769248 |
| O  | 0.7127383090  | 5.8888816170  | 1.6971019120  |
| O  | 0.7127383090  | 9.1373301700  | 4.9455504650  |
| O  | 0.7028114646  | 5.8492933153  | 8.2775573674  |
| O  | 0.6935574577  | 9.1538295032  | 11.5097079941 |
| O  | 0.7127383090  | 5.8888816170  | 4.2334939360  |
| O  | 0.7127383090  | 9.1373301700  | 7.4819424890  |
| O  | 0.6931074847  | 5.8456022361  | 10.8357598950 |
| O  | 0.6944136425  | 9.0618169821  | 14.0577695485 |
| O  | 2.1922383090  | 10.4055261820 | 2.9652979240  |
| O  | 2.1922383090  | 7.1570776290  | 6.2137464770  |
| O  | 2.1782158717  | 10.4169402057 | 9.5640463615  |
| O  | 2.1757373722  | 7.0389538753  | 12.8981061984 |
| O  | 2.1922383090  | 7.8691341580  | 2.9652979240  |
| O  | 2.1922383090  | 11.1175827100 | 6.2137464770  |
| O  | 2.1733013296  | 7.8089606194  | 9.5625835267  |
| O  | 2.1782780379  | 11.1110600709 | 12.9839436435 |
| Ti | 3.6717383090  | 9.1373301700  | 2.9652979240  |
| Ti | 3.6717383090  | 5.8888816170  | 6.2137464770  |
| Ti | 3.6787805146  | 9.0307228880  | 9.6298008651  |
| Ti | 3.6864639299  | 5.8207207846  | 12.6331952878 |
| Ti | 5.1512383090  | 5.8888816170  | 2.9652979240  |
| Ti | 5.1512383090  | 9.1373301700  | 6.2137464770  |
| Ti | 5.1799803053  | 5.7743308094  | 9.4235622855  |
| Ti | 5.1577961851  | 9.1022008370  | 12.9268315618 |
| O  | 3.6717383090  | 5.8888816170  | 1.6971019120  |
| O  | 3.6717383090  | 9.1373301700  | 4.9455504650  |
| O  | 3.6584621178  | 5.8504092989  | 8.2756435561  |
| O  | 3.7049257271  | 9.1114272696  | 11.4761126441 |
| O  | 3.6717383090  | 5.8888816170  | 4.2334939360  |
| O  | 3.6717383090  | 9.1373301700  | 7.4819424890  |
| O  | 3.6615904014  | 5.8426793984  | 10.8290208661 |
| O  | 3.6502691782  | 9.0595124855  | 14.0621226196 |
| O  | 5.1512383090  | 10.4055261820 | 2.9652979240  |
| O  | 5.1512383090  | 7.1570776290  | 6.2137464770  |
| O  | 5.1922455186  | 10.3927004693 | 9.4897516971  |
| O  | 5.1314135015  | 7.0419981076  | 12.8927060245 |
| O  | 5.1512383090  | 7.8691341580  | 2.9652979240  |
| O  | 5.1512383090  | 11.1175827100 | 6.2137464770  |
| O  | 5.1402521152  | 7.8018897474  | 9.4763194011  |
| O  | 5.1370570874  | 11.1048358277 | 12.9828005622 |
| Ti | 6.6307383090  | 9.1373301700  | 2.9652979240  |
| Ti | 6.6307383090  | 5.8888816170  | 6.2137464770  |
| Ti | 6.6540612771  | 9.0366381868  | 9.6303855688  |
| Ti | 6.6530218725  | 5.8289460199  | 12.6647299223 |

|    |               |               |               |
|----|---------------|---------------|---------------|
| Ti | 8.1102383090  | 5.8888816170  | 2.9652979240  |
| Ti | 8.1102383090  | 9.1373301700  | 6.2137464770  |
| Ti | 8.1352676554  | 5.8783976475  | 9.4982222756  |
| Ti | 8.1249818945  | 9.0900429897  | 13.0170026059 |
| O  | 6.6307383090  | 5.8888816170  | 1.6971019120  |
| O  | 6.6307383090  | 9.1373301700  | 4.9455504650  |
| O  | 6.6842019146  | 5.8519942663  | 8.2815148152  |
| O  | 6.6147763108  | 9.0667705537  | 11.5053524442 |
| O  | 6.6307383090  | 5.8888816170  | 4.2334939360  |
| O  | 6.6307383090  | 9.1373301700  | 7.4819424890  |
| O  | 6.6088543649  | 5.8473631756  | 10.8365455290 |
| O  | 6.6113655513  | 9.0626146152  | 14.0600547966 |
| O  | 8.1102383090  | 10.4055261820 | 2.9652979240  |
| O  | 8.1102383090  | 7.1570776290  | 6.2137464770  |
| O  | 8.1010095769  | 10.4108042887 | 9.5705344873  |
| O  | 8.1508381416  | 7.0519206533  | 12.8863979321 |
| O  | 8.1102383090  | 7.8691341580  | 2.9652979240  |
| O  | 8.1102383090  | 11.1175827100 | 6.2137464770  |
| O  | 8.1645263989  | 7.8086363535  | 9.5644317069  |
| O  | 8.0930903075  | 11.1067498541 | 12.9833596984 |
| Ti | 9.5897383090  | 9.1373301700  | 2.9652979240  |
| Ti | 9.5897383090  | 5.8888816170  | 6.2137464770  |
| Ti | 9.6232794852  | 9.1810593147  | 9.6979941597  |
| Ti | 9.5989072441  | 5.7858930617  | 12.6602360000 |
| Ti | 11.0692383090 | 5.8888816170  | 2.9652979240  |
| Ti | 11.0692383090 | 9.1373301700  | 6.2137464770  |
| Ti | 11.0826943938 | 5.9037907236  | 9.4270167216  |
| Ti | 11.0467646175 | 9.0379861659  | 13.0468919444 |
| O  | 9.5897383090  | 5.8888816170  | 1.6971019120  |
| O  | 9.5897383090  | 9.1373301700  | 4.9455504650  |
| O  | 9.5816076707  | 5.8455513901  | 8.2831146014  |
| O  | 9.6132357498  | 9.0960309668  | 11.5611815177 |
| O  | 9.5897383090  | 5.8888816170  | 4.2334939360  |
| O  | 9.5897383090  | 9.1373301700  | 7.4819424890  |
| O  | 9.6549185061  | 5.8410586342  | 10.8396239023 |
| O  | 9.5699802472  | 9.0643106640  | 14.1458275640 |
| O  | 11.0692383090 | 10.4055261820 | 2.9652979240  |
| O  | 11.0692383090 | 7.1570776290  | 6.2137464770  |
| O  | 11.0635864975 | 10.4127102043 | 9.5651049890  |
| O  | 11.0585699979 | 7.0277886773  | 12.9894401776 |
| O  | 11.0692383090 | 7.8691341580  | 2.9652979240  |
| O  | 11.0692383090 | 11.1175827100 | 6.2137464770  |
| O  | 11.0598052840 | 7.8110786693  | 9.5589734701  |
| O  | 11.0533706519 | 11.1011933937 | 12.9854163028 |
| Ti | 12.5487383090 | 9.1373301700  | 2.9652979240  |
| Ti | 12.5487383090 | 5.8888816170  | 6.2137464770  |
| Ti | 12.5657248096 | 9.1140828734  | 9.6796054256  |
| Ti | 12.5546833477 | 5.8114254162  | 12.6317628727 |
| Ti | 14.0282383090 | 5.8888816170  | 2.9652979240  |
| Ti | 14.0282383090 | 9.1373301700  | 6.2137464770  |
| Ti | 14.0340708628 | 5.7998195753  | 9.4457987631  |
| Ti | 13.9773346230 | 9.0456845177  | 13.0190748698 |
| O  | 12.5487383090 | 5.8888816170  | 1.6971019120  |
| O  | 12.5487383090 | 9.1373301700  | 4.9455504650  |
| O  | 12.5676891253 | 5.8584397719  | 8.2564404401  |
| O  | 12.5311770029 | 9.0650775174  | 11.5345798563 |
| O  | 12.5487383090 | 5.8888816170  | 4.2334939360  |
| O  | 12.5487383090 | 9.1373301700  | 7.4819424890  |
| O  | 12.5370822461 | 5.8479702285  | 10.8331350766 |
| O  | 12.5305117136 | 9.0627172269  | 14.1402847614 |
| O  | 14.0282383090 | 10.4055261820 | 2.9652979240  |
| O  | 14.0282383090 | 7.1570776290  | 6.2137464770  |
| O  | 14.0111471732 | 10.4098569977 | 9.5655683508  |
| O  | 14.0153983617 | 7.0272564492  | 12.9876414751 |

|    |               |               |               |
|----|---------------|---------------|---------------|
| O  | 14.0282383090 | 7.8691341580  | 2.9652979240  |
| O  | 14.0282383090 | 11.1175827100 | 6.2137464770  |
| O  | 14.0148815558 | 7.8039231420  | 9.5629910846  |
| O  | 14.0063227442 | 11.1039654252 | 12.9849870248 |
| Ti | 15.5077383090 | 9.1373301700  | 2.9652979240  |
| Ti | 15.5077383090 | 5.8888816170  | 6.2137464770  |
| Ti | 15.5132306587 | 9.0408982070  | 9.6390408533  |
| Ti | 15.5154778199 | 5.8060825385  | 12.6376057479 |
| Ti | 16.9872383090 | 5.8888816170  | 2.9652979240  |
| Ti | 16.9872383090 | 9.1373301700  | 6.2137464770  |
| Ti | 16.9975986092 | 5.7987476078  | 9.4388294801  |
| Ti | 16.9268106073 | 9.0946332322  | 12.9666009388 |
| O  | 15.5077383090 | 5.8888816170  | 1.6971019120  |
| O  | 15.5077383090 | 9.1373301700  | 4.9455504650  |
| O  | 15.4997429619 | 5.8511274822  | 8.2773504100  |
| O  | 15.4914599684 | 9.0666192421  | 11.5172367462 |
| O  | 15.5077383090 | 5.8888816170  | 4.2334939360  |
| O  | 15.5077383090 | 9.1373301700  | 7.4819424890  |
| O  | 15.4925988688 | 5.7643320976  | 10.8396835241 |
| O  | 15.4851032936 | 9.0645268245  | 14.0671549575 |
| O  | 16.9872383090 | 10.4055261820 | 2.9652979240  |
| O  | 16.9872383090 | 7.1570776290  | 6.2137464770  |
| O  | 16.9719656501 | 10.4095883288 | 9.4798596327  |
| O  | 16.9704808236 | 7.0261162719  | 12.9829311345 |
| O  | 16.9872383090 | 7.8691341580  | 2.9652979240  |
| O  | 16.9872383090 | 11.1175827100 | 6.2137464770  |
| O  | 16.9719998010 | 7.8026529811  | 9.5649492831  |
| O  | 16.9661808570 | 11.1082437335 | 12.9867207219 |
| Ti | 0.7127383090  | 15.6342272750 | 2.9652979240  |
| Ti | 0.7127383090  | 12.3857787220 | 6.2137464770  |
| Ti | 0.7136951589  | 15.5560013043 | 9.6498310114  |
| Ti | 0.7060651151  | 12.3349470109 | 12.6297558254 |
| Ti | 2.1922383090  | 12.3857787220 | 2.9652979240  |
| Ti | 2.1922383090  | 15.6342272750 | 6.2137464770  |
| Ti | 2.2099825244  | 12.3241255785 | 9.4483239228  |
| Ti | 2.2206734758  | 15.6080747281 | 12.9488318573 |
| O  | 0.7127383090  | 12.3857787220 | 1.6971019120  |
| O  | 0.7127383090  | 15.6342272750 | 4.9455504650  |
| O  | 0.7353009873  | 12.3650849828 | 8.2618607188  |
| O  | 0.6874375932  | 15.5915869035 | 11.5138476916 |
| O  | 0.7127383090  | 12.3857787220 | 4.2334939360  |
| O  | 0.7127383090  | 15.6342272750 | 7.4819424890  |
| O  | 0.6896930558  | 12.3725678187 | 10.8320607284 |
| O  | 0.7644923090  | 15.5938832451 | 14.0610739276 |
| O  | 2.1922383090  | 16.9024232870 | 2.9652979240  |
| O  | 2.1922383090  | 13.6539747350 | 6.2137464770  |
| O  | 2.1803011487  | 16.8735060264 | 9.5644661693  |
| O  | 2.1755338505  | 13.5520218104 | 12.8968538247 |
| O  | 2.1922383090  | 14.3660312630 | 2.9652979240  |
| O  | 2.1922383090  | 17.6144798160 | 6.2137464770  |
| O  | 2.1762593427  | 14.3098748936 | 9.5610929426  |
| O  | 2.2523431595  | 17.6298207339 | 12.8926783656 |
| Ti | 3.6717383090  | 15.6342272750 | 2.9652979240  |
| Ti | 3.6717383090  | 12.3857787220 | 6.2137464770  |
| Ti | 3.6974540647  | 15.5319539028 | 9.6309641957  |
| Ti | 3.6723748181  | 12.3439526777 | 12.6342781198 |
| Ti | 5.1512383090  | 12.3857787220 | 2.9652979240  |
| Ti | 5.1512383090  | 15.6342272750 | 6.2137464770  |
| Ti | 5.1767656182  | 12.2652890662 | 9.4211702599  |
| Ti | 5.1605668737  | 15.5619504989 | 12.9843015306 |
| O  | 3.6717383090  | 12.3857787220 | 1.6971019120  |
| O  | 3.6717383090  | 15.6342272750 | 4.9455504650  |
| O  | 3.6623986714  | 12.3704138020 | 8.2753061362  |
| O  | 3.7023591016  | 15.5232251115 | 11.4876228893 |

|    |               |               |               |
|----|---------------|---------------|---------------|
| O  | 3.6717383090  | 12.3857787220 | 4.2334939360  |
| O  | 3.6717383090  | 15.6342272750 | 7.4819424890  |
| O  | 3.7356674788  | 12.3716393725 | 10.8331622880 |
| O  | 3.6580728424  | 15.5936980145 | 14.0577136320 |
| O  | 5.1512383090  | 16.9024232870 | 2.9652979240  |
| O  | 5.1512383090  | 13.6539747350 | 6.2137464770  |
| O  | 5.1446164544  | 16.8759153451 | 9.5630327715  |
| O  | 5.1357880418  | 13.5365566070 | 13.0750383682 |
| O  | 5.1512383090  | 14.3660312630 | 2.9652979240  |
| O  | 5.1512383090  | 17.6144798160 | 6.2137464770  |
| O  | 5.1441098279  | 14.3136731712 | 9.4707063129  |
| O  | 5.1437945894  | 17.6186581874 | 12.8863612898 |
| Ti | 6.6307383090  | 15.6342272750 | 2.9652979240  |
| Ti | 6.6307383090  | 12.3857787220 | 6.2137464770  |
| Ti | 6.6571340925  | 15.5353525785 | 9.6537873589  |
| Ti | 6.6312212443  | 12.3399695077 | 12.6404969806 |
| Ti | 8.1102383090  | 12.3857787220 | 2.9652979240  |
| Ti | 8.1102383090  | 15.6342272750 | 6.2137464770  |
| Ti | 8.1381766541  | 12.3513103322 | 9.4516102233  |
| Ti | 8.1203079878  | 15.5488237676 | 12.9954189254 |
| O  | 6.6307383090  | 12.3857787220 | 1.6971019120  |
| O  | 6.6307383090  | 15.6342272750 | 4.9455504650  |
| O  | 6.6817888113  | 12.3756754056 | 8.2704335020  |
| O  | 6.6101352473  | 15.4983522379 | 11.5107452503 |
| O  | 6.6307383090  | 12.3857787220 | 4.2334939360  |
| O  | 6.6307383090  | 15.6342272750 | 7.4819424890  |
| O  | 6.6128992405  | 12.3762971655 | 10.8380550352 |
| O  | 6.6193676046  | 15.5953883800 | 14.0649648568 |
| O  | 8.1102383090  | 16.9024232870 | 2.9652979240  |
| O  | 8.1102383090  | 13.6539747350 | 6.2137464770  |
| O  | 8.0915978626  | 16.8735099356 | 9.5671257669  |
| O  | 8.0958746961  | 13.5433795721 | 12.9853806907 |
| O  | 8.1102383090  | 14.3660312630 | 2.9652979240  |
| O  | 8.1102383090  | 17.6144798160 | 6.2137464770  |
| O  | 8.1674848008  | 14.3142258540 | 9.5600865978  |
| O  | 8.0951429532  | 17.5600419730 | 12.8822977394 |
| Ti | 9.5897383090  | 15.6342272750 | 2.9652979240  |
| Ti | 9.5897383090  | 12.3857787220 | 6.2137464770  |
| Ti | 9.6072061967  | 15.6538421012 | 9.6444182696  |
| Ti | 9.6098475036  | 12.3208846966 | 12.6431780805 |
| Ti | 11.0692383090 | 12.3857787220 | 2.9652979240  |
| Ti | 11.0692383090 | 15.6342272750 | 6.2137464770  |
| Ti | 11.0930405486 | 12.4323238088 | 9.4246066960  |
| Ti | 11.0823426524 | 15.5542294494 | 12.9831765546 |
| O  | 9.5897383090  | 12.3857787220 | 1.6971019120  |
| O  | 9.5897383090  | 15.6342272750 | 4.9455504650  |
| O  | 9.5886276009  | 12.3645223563 | 8.2686870171  |
| O  | 9.6471888805  | 15.5883767256 | 11.5056638762 |
| O  | 9.5897383090  | 12.3857787220 | 4.2334939360  |
| O  | 9.5897383090  | 15.6342272750 | 7.4819424890  |
| O  | 9.6494565052  | 12.3743783650 | 10.8426045428 |
| O  | 9.5742137457  | 15.5936878326 | 14.0645923103 |
| O  | 11.0692383090 | 16.9024232870 | 2.9652979240  |
| O  | 11.0692383090 | 13.6539747350 | 6.2137464770  |
| O  | 11.1056456058 | 16.9040071248 | 9.4959547859  |
| O  | 11.0537170294 | 13.5382176270 | 13.0718975771 |
| O  | 11.0692383090 | 14.3660312630 | 2.9652979240  |
| O  | 11.0692383090 | 17.6144798160 | 6.2137464770  |
| O  | 11.0617284951 | 14.3238462201 | 9.4754011809  |
| O  | 11.1042547299 | 17.5844512347 | 12.9130708492 |
| Ti | 12.5487383090 | 15.6342272750 | 2.9652979240  |
| Ti | 12.5487383090 | 12.3857787220 | 6.2137464770  |
| Ti | 12.5763905336 | 15.6341017402 | 9.6429936129  |
| Ti | 12.5516943273 | 12.3320842912 | 12.6447174632 |



|    |               |               |               |
|----|---------------|---------------|---------------|
| Ti | 14.0282383090 | 12.3857787220 | 2.9652979240  |
| Ti | 14.0282383090 | 15.6342272750 | 6.2137464770  |
| Ti | 14.0389460669 | 12.3313960873 | 9.4483207368  |
| Ti | 14.0296812532 | 15.6222901286 | 13.0006442421 |
| O  | 12.5487383090 | 12.3857787220 | 1.6971019120  |
| O  | 12.5487383090 | 15.6342272750 | 4.9455504650  |
| O  | 12.5673678598 | 12.3588092975 | 8.2571299198  |
| O  | 12.5329021765 | 15.5892618576 | 11.5124161079 |
| O  | 12.5487383090 | 12.3857787220 | 4.2334939360  |
| O  | 12.5487383090 | 15.6342272750 | 7.4819424890  |
| O  | 12.5300500572 | 12.3765751338 | 10.8388706594 |
| O  | 12.5411234562 | 15.5922267436 | 14.0696405815 |
| O  | 14.0282383090 | 16.9024232870 | 2.9652979240  |
| O  | 14.0282383090 | 13.6539747350 | 6.2137464770  |
| O  | 14.0475136849 | 16.8939779492 | 9.5430249636  |
| O  | 14.0115887440 | 13.5491399380 | 12.9841133548 |
| O  | 14.0282383090 | 14.3660312630 | 2.9652979240  |
| O  | 14.0282383090 | 17.6144798160 | 6.2137464770  |
| O  | 14.0136944802 | 14.3158987836 | 9.5636463407  |
| O  | 14.0138137072 | 17.6325968250 | 12.9831821287 |
| Ti | 15.5077383090 | 15.6342272750 | 2.9652979240  |
| Ti | 15.5077383090 | 12.3857787220 | 6.2137464770  |
| Ti | 15.5085753045 | 15.5565490498 | 9.6810396824  |
| Ti | 15.4866072272 | 12.3280046903 | 12.6384762101 |
| Ti | 16.9872383090 | 12.3857787220 | 2.9652979240  |
| Ti | 16.9872383090 | 15.6342272750 | 6.2137464770  |
| Ti | 17.0001943307 | 12.3172689028 | 9.4208570244  |
| Ti | 17.0111041108 | 15.5671302102 | 13.0182630912 |
| O  | 15.5077383090 | 12.3857787220 | 1.6971019120  |
| O  | 15.5077383090 | 15.6342272750 | 4.9455504650  |
| O  | 15.4942944404 | 12.3757300381 | 8.2750439192  |
| O  | 15.4933862527 | 15.5905122803 | 11.5232410510 |
| O  | 15.5077383090 | 12.3857787220 | 4.2334939360  |
| O  | 15.5077383090 | 15.6342272750 | 7.4819424890  |
| O  | 15.4966660396 | 12.2909876656 | 10.8365383885 |
| O  | 15.5000640194 | 15.5922293958 | 14.0698859753 |
| O  | 16.9872383090 | 16.9024232870 | 2.9652979240  |
| O  | 16.9872383090 | 13.6539747350 | 6.2137464770  |
| O  | 16.9752884750 | 16.8723234369 | 9.5635731401  |
| O  | 16.9696770971 | 13.5497100352 | 12.9866232237 |
| O  | 16.9872383090 | 14.3660312630 | 2.9652979240  |
| O  | 16.9872383090 | 17.6144798160 | 6.2137464770  |
| O  | 16.9734502310 | 14.3116178827 | 9.4811839749  |
| O  | 16.9751126406 | 17.6294922103 | 12.9876842081 |
| Au | 4.2659898159  | 5.0292540058  | 16.3929047622 |
| Au | 3.8428047948  | 7.8122540139  | 15.9990324957 |
| Au | 9.4219149629  | 7.0681548861  | 19.9915718712 |
| Au | 8.4418623751  | 8.1662069114  | 17.5230022880 |
| Au | 9.5801142846  | 3.0969104287  | 16.3007434788 |
| Au | 4.4628982227  | 6.8880974699  | 18.5221407243 |
| Au | 7.7934706513  | 4.6633124467  | 20.5238800185 |
| Au | 9.8935872940  | 4.6724882065  | 18.5395177379 |
| Au | 6.7609808277  | 8.1502083878  | 19.8417505568 |
| Au | 5.5531009358  | 4.2439164329  | 18.7921029448 |
| Au | 10.9968766636 | 7.0704684411  | 17.6943821567 |
| Au | 5.8797171029  | 9.1521933872  | 17.4442991565 |
| Au | 7.8966522900  | 2.7388766028  | 18.5493236732 |
| Au | 9.0749454316  | 5.8415529774  | 16.0006861492 |
| Au | 6.4951984922  | 6.7778293158  | 15.9036259202 |
| Au | 5.2871791500  | 5.9647475736  | 20.9839936723 |
| Au | 7.7156446838  | 6.9383232162  | 22.1457856738 |
| Au | 6.8417067145  | 3.9954330128  | 16.2275299636 |

- (3) The optimized structure obtained from the third BOMD simulation of the soft-landing of Au<sub>18</sub> onto TiO<sub>2</sub>(110) surface

|    |              |               |               |
|----|--------------|---------------|---------------|
| Ti | 0.7127383090 | 2.6404330640  | 2.9652979240  |
| Ti | 0.7127383090 | -0.6080154890 | 6.2137464770  |
| Ti | 0.7129639610 | 2.5796238023  | 9.6222180179  |
| Ti | 0.7099749189 | -0.6465847010 | 12.5616025602 |
| Ti | 2.1922383090 | -0.6080154890 | 2.9652979240  |
| Ti | 2.1922383090 | 2.6404330640  | 6.2137464770  |
| Ti | 2.2211363014 | -0.6391818042 | 9.4225202650  |
| Ti | 2.1516614844 | 2.5917953151  | 12.9800046678 |
| O  | 0.7127383090 | -0.6080154890 | 1.6971019120  |
| O  | 0.7127383090 | 2.6404330640  | 4.9455504650  |
| O  | 0.7648906342 | -0.5956691506 | 8.2205216760  |
| O  | 0.6942441300 | 2.5396034971  | 11.5110789307 |
| O  | 0.7127383090 | -0.6080154890 | 4.2334939360  |
| O  | 0.7127383090 | 2.6404330640  | 7.4819424890  |
| O  | 0.6959349528 | -0.5850045427 | 10.7565233877 |
| O  | 0.6892198489 | 2.5387841984  | 14.0657321740 |
| O  | 2.1922383090 | 3.9086290760  | 2.9652979240  |
| O  | 2.1922383090 | 0.6601805230  | 6.2137464770  |
| O  | 2.1704238099 | 3.9008372269  | 9.4782842625  |
| O  | 2.1709492464 | 0.5701584134  | 12.9780849928 |
| O  | 2.1922383090 | 1.3722370520  | 2.9652979240  |
| O  | 2.1922383090 | 4.6206856050  | 6.2137464770  |
| O  | 2.1877375198 | 1.3502440514  | 9.4790914899  |
| O  | 2.1760141097 | 4.5979882595  | 12.9699663340 |
| Ti | 3.6717383090 | 2.6404330640  | 2.9652979240  |
| Ti | 3.6717383090 | -0.6080154890 | 6.2137464770  |
| Ti | 3.6360503653 | 2.6702625328  | 9.6205852968  |
| Ti | 3.6542025906 | -0.6397934999 | 12.6307425081 |
| Ti | 5.1512383090 | -0.6080154890 | 2.9652979240  |
| Ti | 5.1512383090 | 2.6404330640  | 6.2137464770  |
| Ti | 5.1693406113 | -0.5426242455 | 9.4333369401  |
| Ti | 5.0881753309 | 2.5999830909  | 12.9612810318 |
| O  | 3.6717383090 | -0.6080154890 | 1.6971019120  |
| O  | 3.6717383090 | 2.6404330640  | 4.9455504650  |
| O  | 3.6955236705 | -0.6485571200 | 8.2514708227  |
| O  | 3.6564498477 | 2.6305971509  | 11.5048278396 |
| O  | 3.6717383090 | -0.6080154890 | 4.2334939360  |
| O  | 3.6717383090 | 2.6404330640  | 7.4819424890  |
| O  | 3.6590352820 | -0.5852402575 | 10.8299446602 |
| O  | 3.6537198841 | 2.5413293689  | 14.0620445601 |
| O  | 5.1512383090 | 3.9086290760  | 2.9652979240  |
| O  | 5.1512383090 | 0.6601805230  | 6.2137464770  |
| O  | 5.1350487200 | 3.9028788993  | 9.4764950870  |
| O  | 5.1380417389 | 0.5823590666  | 12.9825524383 |
| O  | 5.1512383090 | 1.3722370520  | 2.9652979240  |
| O  | 5.1512383090 | 4.6206856050  | 6.2137464770  |
| O  | 5.1335931649 | 1.3330979658  | 9.4760219355  |
| O  | 5.1261962109 | 4.6550430599  | 12.9820064597 |
| Ti | 6.6307383090 | 2.6404330640  | 2.9652979240  |
| Ti | 6.6307383090 | -0.6080154890 | 6.2137464770  |
| Ti | 6.6228546559 | 2.6711623994  | 9.6105426679  |
| Ti | 6.6214306182 | -0.6262404073 | 12.6389954805 |
| Ti | 8.1102383090 | -0.6080154890 | 2.9652979240  |
| Ti | 8.1102383090 | 2.6404330640  | 6.2137464770  |
| Ti | 8.1203939558 | -0.5558382504 | 9.4281131520  |

|    |               |               |               |
|----|---------------|---------------|---------------|
| Ti | 8.1063955409  | 2.5652496379  | 12.8752968742 |
| O  | 6.6307383090  | -0.6080154890 | 1.6971019120  |
| O  | 6.6307383090  | 2.6404330640  | 4.9455504650  |
| O  | 6.6234319416  | -0.6686637160 | 8.2604219088  |
| O  | 6.6052547236  | 2.5370857859  | 11.4439769662 |
| O  | 6.6307383090  | -0.6080154890 | 4.2334939360  |
| O  | 6.6307383090  | 2.6404330640  | 7.4819424890  |
| O  | 6.6164983707  | -0.6776503587 | 10.8343641295 |
| O  | 6.6159346872  | 2.6343446916  | 14.0514494450 |
| O  | 8.1102383090  | 3.9086290760  | 2.9652979240  |
| O  | 8.1102383090  | 0.6601805230  | 6.2137464770  |
| O  | 8.0947932019  | 3.8956571230  | 9.5634746155  |
| O  | 8.0945965790  | 0.5680799243  | 12.9715922927 |
| O  | 8.1102383090  | 1.3722370520  | 2.9652979240  |
| O  | 8.1102383090  | 4.6206856050  | 6.2137464770  |
| O  | 8.0912906322  | 1.2826952816  | 9.4711081146  |
| O  | 8.0878713754  | 4.5763328513  | 12.7940916225 |
| Ti | 9.5897383090  | 2.6404330640  | 2.9652979240  |
| Ti | 9.5897383090  | -0.6080154890 | 6.2137464770  |
| Ti | 9.6119009831  | 2.6634147953  | 9.6030868937  |
| Ti | 9.5967645483  | -0.7179024360 | 12.6290279807 |
| Ti | 11.0692383090 | -0.6080154890 | 2.9652979240  |
| Ti | 11.0692383090 | 2.6404330640  | 6.2137464770  |
| Ti | 11.0786246296 | -0.6247207887 | 9.3894947070  |
| Ti | 11.0911230800 | 2.5254155441  | 12.9342914674 |
| O  | 9.5897383090  | -0.6080154890 | 1.6971019120  |
| O  | 9.5897383090  | 2.6404330640  | 4.9455504650  |
| O  | 9.5768161681  | -0.6751417813 | 8.2311006366  |
| O  | 9.5689420048  | 2.5298555910  | 11.4351234452 |
| O  | 9.5897383090  | -0.6080154890 | 4.2334939360  |
| O  | 9.5897383090  | 2.6404330640  | 7.4819424890  |
| O  | 9.5697103296  | -0.6817602082 | 10.8294648012 |
| O  | 9.5730461592  | 2.5432263283  | 13.9715874658 |
| O  | 11.0692383090 | 3.9086290760  | 2.9652979240  |
| O  | 11.0692383090 | 0.6601805230  | 6.2137464770  |
| O  | 11.0599888863 | 3.8901842184  | 9.5653348525  |
| O  | 11.0530847317 | 0.5014848509  | 12.9797759748 |
| O  | 11.0692383090 | 1.3722370520  | 2.9652979240  |
| O  | 11.0692383090 | 4.6206856050  | 6.2137464770  |
| O  | 11.0527329000 | 1.2851507260  | 9.4701767914  |
| O  | 11.0575387549 | 4.5724386994  | 12.7941886704 |
| Ti | 12.5487383090 | 2.6404330640  | 2.9652979240  |
| Ti | 12.5487383090 | -0.6080154890 | 6.2137464770  |
| Ti | 12.5652404186 | 2.5773628771  | 9.6181506038  |
| Ti | 12.5621681269 | -0.6702773604 | 12.5611012051 |
| Ti | 14.0282383090 | -0.6080154890 | 2.9652979240  |
| Ti | 14.0282383090 | 2.6404330640  | 6.2137464770  |
| Ti | 14.0437451397 | -0.7111762323 | 9.4109607377  |
| Ti | 14.0396132326 | 2.5621946377  | 12.9757118545 |
| O  | 12.5487383090 | -0.6080154890 | 1.6971019120  |
| O  | 12.5487383090 | 2.6404330640  | 4.9455504650  |
| O  | 12.5495412322 | -0.6778313846 | 8.2255656263  |
| O  | 12.5763288026 | 2.5232730904  | 11.4799208736 |
| O  | 12.5487383090 | -0.6080154890 | 4.2334939360  |
| O  | 12.5487383090 | 2.6404330640  | 7.4819424890  |
| O  | 12.5342077630 | -0.5911872964 | 10.7568842683 |
| O  | 12.5258636973 | 2.5368135753  | 14.0536610353 |
| O  | 14.0282383090 | 3.9086290760  | 2.9652979240  |
| O  | 14.0282383090 | 0.6601805230  | 6.2137464770  |
| O  | 14.0107351454 | 3.8896556963  | 9.4807031092  |
| O  | 14.0158213142 | 0.4917440108  | 12.9835417622 |
| O  | 14.0282383090 | 1.3722370520  | 2.9652979240  |
| O  | 14.0282383090 | 4.6206856050  | 6.2137464770  |
| O  | 14.0196043842 | 1.2888766921  | 9.4720366910  |

|    |               |               |               |
|----|---------------|---------------|---------------|
| O  | 14.0127883499 | 4.5832136864  | 12.9796493269 |
| Ti | 15.5077383090 | 2.6404330640  | 2.9652979240  |
| Ti | 15.5077383090 | -0.6080154890 | 6.2137464770  |
| Ti | 15.5173598551 | 2.5299265526  | 9.6240008409  |
| Ti | 15.5208438807 | -0.7084828046 | 12.5554180285 |
| Ti | 16.9872383090 | -0.6080154890 | 2.9652979240  |
| Ti | 16.9872383090 | 2.6404330640  | 6.2137464770  |
| Ti | 17.0121100315 | -0.7261434403 | 9.3534856194  |
| Ti | 16.9771697211 | 2.5682587057  | 12.9744259090 |
| O  | 15.5077383090 | -0.6080154890 | 1.6971019120  |
| O  | 15.5077383090 | 2.6404330640  | 4.9455504650  |
| O  | 15.4933637824 | -0.6756639051 | 8.2131620570  |
| O  | 15.4874436135 | 2.5365014937  | 11.5105343133 |
| O  | 15.5077383090 | -0.6080154890 | 4.2334939360  |
| O  | 15.5077383090 | 2.6404330640  | 7.4819424890  |
| O  | 15.5674292155 | -0.5897066820 | 10.7538022712 |
| O  | 15.4905467807 | 2.5360423939  | 14.0655441689 |
| O  | 16.9872383090 | 3.9086290760  | 2.9652979240  |
| O  | 16.9872383090 | 0.6601805230  | 6.2137464770  |
| O  | 16.9658161246 | 3.8981828927  | 9.5655994964  |
| O  | 16.9671501369 | 0.5007298771  | 12.9827109487 |
| O  | 16.9872383090 | 1.3722370520  | 2.9652979240  |
| O  | 16.9872383090 | 4.6206856050  | 6.2137464770  |
| O  | 16.9776290587 | 1.3437733955  | 9.4665011256  |
| O  | 16.9741934246 | 4.5822940747  | 12.9782460663 |
| Ti | 0.7127383090  | 9.1373301700  | 2.9652979240  |
| Ti | 0.7127383090  | 5.8888816170  | 6.2137464770  |
| Ti | 0.7228684650  | 9.1011572373  | 9.6043500494  |
| Ti | 0.7205216135  | 5.7936800218  | 12.5612707535 |
| Ti | 2.1922383090  | 5.8888816170  | 2.9652979240  |
| Ti | 2.1922383090  | 9.1373301700  | 6.2137464770  |
| Ti | 2.1803012685  | 5.8946405553  | 9.3725135827  |
| Ti | 2.2000792100  | 9.0975721093  | 12.9617024033 |
| O  | 0.7127383090  | 5.8888816170  | 1.6971019120  |
| O  | 0.7127383090  | 9.1373301700  | 4.9455504650  |
| O  | 0.6879425447  | 5.8469406106  | 8.2170042340  |
| O  | 0.6954344146  | 9.0681982400  | 11.4441805993 |
| O  | 0.7127383090  | 5.8888816170  | 4.2334939360  |
| O  | 0.7127383090  | 9.1373301700  | 7.4819424890  |
| O  | 0.7005251599  | 5.8440067213  | 10.7597156265 |
| O  | 0.6982767458  | 9.0630003649  | 14.0436789075 |
| O  | 2.1922383090  | 10.4055261820 | 2.9652979240  |
| O  | 2.1922383090  | 7.1570776290  | 6.2137464770  |
| O  | 2.1755843446  | 10.4189812311 | 9.4776439356  |
| O  | 2.1720590922  | 7.0359316601  | 12.8899671085 |
| O  | 2.1922383090  | 7.8691341580  | 2.9652979240  |
| O  | 2.1922383090  | 11.1175827100 | 6.2137464770  |
| O  | 2.1781887594  | 7.8065676428  | 9.4721885426  |
| O  | 2.1720200560  | 11.1084577373 | 12.9827321346 |
| Ti | 3.6717383090  | 9.1373301700  | 2.9652979240  |
| Ti | 3.6717383090  | 5.8888816170  | 6.2137464770  |
| Ti | 3.6945268942  | 9.1500349803  | 9.6083012003  |
| Ti | 3.6813581452  | 5.8768833631  | 12.5564491495 |
| Ti | 5.1512383090  | 5.8888816170  | 2.9652979240  |
| Ti | 5.1512383090  | 9.1373301700  | 6.2137464770  |
| Ti | 5.1741751441  | 5.8965843998  | 9.3814726265  |
| Ti | 5.1404835337  | 9.1040605630  | 12.9625138112 |
| O  | 3.6717383090  | 5.8888816170  | 1.6971019120  |
| O  | 3.6717383090  | 9.1373301700  | 4.9455504650  |
| O  | 3.6619604873  | 5.8493998207  | 8.2152388191  |
| O  | 3.6499584275  | 9.1492900791  | 11.4595314063 |
| O  | 3.6717383090  | 5.8888816170  | 4.2334939360  |
| O  | 3.6717383090  | 9.1373301700  | 7.4819424890  |
| O  | 3.6546013592  | 5.8455424389  | 10.7535858527 |

|    |               |               |               |
|----|---------------|---------------|---------------|
| O  | 3.6491931632  | 9.0626465170  | 14.0540603900 |
| O  | 5.1512383090  | 10.4055261820 | 2.9652979240  |
| O  | 5.1512383090  | 7.1570776290  | 6.2137464770  |
| O  | 5.1378397166  | 10.4168754523 | 9.4799128348  |
| O  | 5.1253772269  | 7.1020788798  | 12.8855504083 |
| O  | 5.1512383090  | 7.8691341580  | 2.9652979240  |
| O  | 5.1512383090  | 11.1175827100 | 6.2137464770  |
| O  | 5.1373740818  | 7.8104629545  | 9.4774637716  |
| O  | 5.1293030048  | 11.1121002805 | 12.9849589126 |
| Ti | 6.6307383090  | 9.1373301700  | 2.9652979240  |
| Ti | 6.6307383090  | 5.8888816170  | 6.2137464770  |
| Ti | 6.6516490890  | 9.1430657233  | 9.6180867351  |
| Ti | 6.6440927745  | 5.8198300601  | 12.6302972441 |
| Ti | 8.1102383090  | 5.8888816170  | 2.9652979240  |
| Ti | 8.1102383090  | 9.1373301700  | 6.2137464770  |
| Ti | 8.1362263770  | 5.9022952384  | 9.4957058411  |
| Ti | 8.0613552975  | 9.0947384260  | 12.9611625110 |
| O  | 6.6307383090  | 5.8888816170  | 1.6971019120  |
| O  | 6.6307383090  | 9.1373301700  | 4.9455504650  |
| O  | 6.6628050873  | 5.8577416602  | 8.2538408153  |
| O  | 6.6131097642  | 9.1556701813  | 11.5077075893 |
| O  | 6.6307383090  | 5.8888816170  | 4.2334939360  |
| O  | 6.6307383090  | 9.1373301700  | 7.4819424890  |
| O  | 6.6008657793  | 5.8491836954  | 10.8240209250 |
| O  | 6.6082676516  | 9.0630574120  | 14.0642697113 |
| O  | 8.1102383090  | 10.4055261820 | 2.9652979240  |
| O  | 8.1102383090  | 7.1570776290  | 6.2137464770  |
| O  | 8.0931237992  | 10.4151571968 | 9.4804092641  |
| O  | 8.0872742384  | 7.0437345440  | 12.9774798011 |
| O  | 8.1102383090  | 7.8691341580  | 2.9652979240  |
| O  | 8.1102383090  | 11.1175827100 | 6.2137464770  |
| O  | 8.0922402145  | 7.8162682457  | 9.5645902782  |
| O  | 8.0890466641  | 11.1117576331 | 12.9876113942 |
| Ti | 9.5897383090  | 9.1373301700  | 2.9652979240  |
| Ti | 9.5897383090  | 5.8888816170  | 6.2137464770  |
| Ti | 9.6062277331  | 9.1897144262  | 9.6228650692  |
| Ti | 9.6101238983  | 5.8260795228  | 12.7413521572 |
| Ti | 11.0692383090 | 5.8888816170  | 2.9652979240  |
| Ti | 11.0692383090 | 9.1373301700  | 6.2137464770  |
| Ti | 11.0263131062 | 5.8935524449  | 9.5104851991  |
| Ti | 11.0106152106 | 9.1088691303  | 12.9326557579 |
| O  | 9.5897383090  | 5.8888816170  | 1.6971019120  |
| O  | 9.5897383090  | 9.1373301700  | 4.9455504650  |
| O  | 9.5766765521  | 5.8502002231  | 8.2840369413  |
| O  | 9.5684655869  | 9.1579513679  | 11.5143213083 |
| O  | 9.5897383090  | 5.8888816170  | 4.2334939360  |
| O  | 9.5897383090  | 9.1373301700  | 7.4819424890  |
| O  | 9.5702098759  | 5.8499577892  | 10.8418237501 |
| O  | 9.5731513185  | 9.0659303781  | 14.0593616602 |
| O  | 11.0692383090 | 10.4055261820 | 2.9652979240  |
| O  | 11.0692383090 | 7.1570776290  | 6.2137464770  |
| O  | 11.0536124413 | 10.4209176674 | 9.5629149206  |
| O  | 11.0574293172 | 7.0934148534  | 12.8856363125 |
| O  | 11.0692383090 | 7.8691341580  | 2.9652979240  |
| O  | 11.0692383090 | 11.1175827100 | 6.2137464770  |
| O  | 11.0480418792 | 7.8155728974  | 9.5616398651  |
| O  | 11.0559632454 | 11.1164427102 | 12.9756085220 |
| Ti | 12.5487383090 | 9.1373301700  | 2.9652979240  |
| Ti | 12.5487383090 | 5.8888816170  | 6.2137464770  |
| Ti | 12.5643355921 | 9.0977587440  | 9.6292786826  |
| Ti | 12.5513686933 | 5.8150187955  | 12.6716431951 |
| Ti | 14.0282383090 | 5.8888816170  | 2.9652979240  |
| Ti | 14.0282383090 | 9.1373301700  | 6.2137464770  |
| Ti | 13.9680073955 | 5.7977260294  | 9.4171741461  |

|    |               |               |               |
|----|---------------|---------------|---------------|
| Ti | 14.0500443064 | 9.0824207366  | 12.9324801793 |
| O  | 12.5487383090 | 5.8888816170  | 1.6971019120  |
| O  | 12.5487383090 | 9.1373301700  | 4.9455504650  |
| O  | 12.5149208242 | 5.8503651005  | 8.2704575273  |
| O  | 12.5769380793 | 9.1073063065  | 11.4765011540 |
| O  | 12.5487383090 | 5.8888816170  | 4.2334939360  |
| O  | 12.5487383090 | 9.1373301700  | 7.4819424890  |
| O  | 12.5474908442 | 5.8480108744  | 10.8317754169 |
| O  | 12.5399848399 | 9.1540286864  | 14.0565495798 |
| O  | 14.0282383090 | 10.4055261820 | 2.9652979240  |
| O  | 14.0282383090 | 7.1570776290  | 6.2137464770  |
| O  | 14.0135466251 | 10.4210199215 | 9.4721671411  |
| O  | 14.0516124253 | 7.0569520014  | 12.9140594352 |
| O  | 14.0282383090 | 7.8691341580  | 2.9652979240  |
| O  | 14.0282383090 | 11.1175827100 | 6.2137464770  |
| O  | 14.0092725059 | 7.8051472842  | 9.4734278185  |
| O  | 14.0178105696 | 11.1092243604 | 12.8893481735 |
| Ti | 15.5077383090 | 9.1373301700  | 2.9652979240  |
| Ti | 15.5077383090 | 5.8888816170  | 6.2137464770  |
| Ti | 15.5220633932 | 9.0213698980  | 9.5974191136  |
| Ti | 15.5056034882 | 5.8095789722  | 12.6077449155 |
| Ti | 16.9872383090 | 5.8888816170  | 2.9652979240  |
| Ti | 16.9872383090 | 9.1373301700  | 6.2137464770  |
| Ti | 16.9459294812 | 5.7932320785  | 9.4032313788  |
| Ti | 17.0071163959 | 9.0371309247  | 12.9398142152 |
| O  | 15.5077383090 | 5.8888816170  | 1.6971019120  |
| O  | 15.5077383090 | 9.1373301700  | 4.9455504650  |
| O  | 15.4862551260 | 5.8469431815  | 8.2287680858  |
| O  | 15.4885578011 | 9.0680430061  | 11.4416377114 |
| O  | 15.5077383090 | 5.8888816170  | 4.2334939360  |
| O  | 15.5077383090 | 9.1373301700  | 7.4819424890  |
| O  | 15.4902910121 | 5.8432290399  | 10.8154263956 |
| O  | 15.5168517719 | 9.0757893722  | 14.0180412343 |
| O  | 16.9872383090 | 10.4055261820 | 2.9652979240  |
| O  | 16.9872383090 | 7.1570776290  | 6.2137464770  |
| O  | 16.9746582780 | 10.4153187176 | 9.4781964637  |
| O  | 16.9781811572 | 7.0264907464  | 12.8949585176 |
| O  | 16.9872383090 | 7.8691341580  | 2.9652979240  |
| O  | 16.9872383090 | 11.1175827100 | 6.2137464770  |
| O  | 16.9723748605 | 7.8021103773  | 9.4728307710  |
| O  | 16.9677172832 | 11.1015861414 | 12.8878413400 |
| Ti | 0.7127383090  | 15.6342272750 | 2.9652979240  |
| Ti | 0.7127383090  | 12.3857787220 | 6.2137464770  |
| Ti | 0.7429112566  | 15.5655683797 | 9.6286755430  |
| Ti | 0.7076166764  | 12.3264683730 | 12.6278396433 |
| Ti | 2.1922383090  | 12.3857787220 | 2.9652979240  |
| Ti | 2.1922383090  | 15.6342272750 | 6.2137464770  |
| Ti | 2.2148130877  | 12.3636269972 | 9.4227885806  |
| Ti | 2.1351653561  | 15.5701012026 | 12.9748043271 |
| O  | 0.7127383090  | 12.3857787220 | 1.6971019120  |
| O  | 0.7127383090  | 15.6342272750 | 4.9455504650  |
| O  | 0.7384022418  | 12.3668811996 | 8.2438337699  |
| O  | 0.7352149688  | 15.5624151797 | 11.4839451020 |
| O  | 0.7127383090  | 12.3857787220 | 4.2334939360  |
| O  | 0.7127383090  | 15.6342272750 | 7.4819424890  |
| O  | 0.7048731956  | 12.3737717894 | 10.8252807276 |
| O  | 0.6880364219  | 15.5928797581 | 14.0589154719 |
| O  | 2.1922383090  | 16.9024232870 | 2.9652979240  |
| O  | 2.1922383090  | 13.6539747350 | 6.2137464770  |
| O  | 2.1849266697  | 16.9385451428 | 9.5611348260  |
| O  | 2.1734040006  | 13.5475079986 | 12.9870817881 |
| O  | 2.1922383090  | 14.3660312630 | 2.9652979240  |
| O  | 2.1922383090  | 17.6144798160 | 6.2137464770  |
| O  | 2.1873001574  | 14.3240315136 | 9.4756775351  |

|    |               |               |               |
|----|---------------|---------------|---------------|
| O  | 2.1708461486  | 17.6268958302 | 12.8930718049 |
| Ti | 3.6717383090  | 15.6342272750 | 2.9652979240  |
| Ti | 3.6717383090  | 12.3857787220 | 6.2137464770  |
| Ti | 3.6910779322  | 15.6492227296 | 9.6533467056  |
| Ti | 3.6727128574  | 12.3478604948 | 12.6365853783 |
| Ti | 5.1512383090  | 12.3857787220 | 2.9652979240  |
| Ti | 5.1512383090  | 15.6342272750 | 6.2137464770  |
| Ti | 5.1672087718  | 12.4190313825 | 9.4336910684  |
| Ti | 5.0914670349  | 15.6273506052 | 12.9907561461 |
| O  | 3.6717383090  | 12.3857787220 | 1.6971019120  |
| O  | 3.6717383090  | 15.6342272750 | 4.9455504650  |
| O  | 3.6830970195  | 12.3787546496 | 8.2529080041  |
| O  | 3.6555534852  | 15.5902735098 | 11.5141943808 |
| O  | 3.6717383090  | 12.3857787220 | 4.2334939360  |
| O  | 3.6717383090  | 15.6342272750 | 7.4819424890  |
| O  | 3.6539746889  | 12.3729453031 | 10.8330720347 |
| O  | 3.6442922592  | 15.5951693421 | 14.0636586370 |
| O  | 5.1512383090  | 16.9024232870 | 2.9652979240  |
| O  | 5.1512383090  | 13.6539747350 | 6.2137464770  |
| O  | 5.1321557636  | 16.8844806210 | 9.5597651041  |
| O  | 5.1328773646  | 13.5522408768 | 12.9846902033 |
| O  | 5.1512383090  | 14.3660312630 | 2.9652979240  |
| O  | 5.1512383090  | 17.6144798160 | 6.2137464770  |
| O  | 5.1362953232  | 14.3220161781 | 9.5625198166  |
| O  | 5.1280390544  | 17.6376177224 | 12.9867853056 |
| Ti | 6.6307383090  | 15.6342272750 | 2.9652979240  |
| Ti | 6.6307383090  | 12.3857787220 | 6.2137464770  |
| Ti | 6.6329909393  | 15.6657241709 | 9.6462037926  |
| Ti | 6.6219066374  | 12.3464524490 | 12.6319239897 |
| Ti | 8.1102383090  | 12.3857787220 | 2.9652979240  |
| Ti | 8.1102383090  | 15.6342272750 | 6.2137464770  |
| Ti | 8.1208661867  | 12.4420744642 | 9.4304300036  |
| Ti | 8.0462739614  | 15.6187098718 | 12.9835205945 |
| O  | 6.6307383090  | 12.3857787220 | 1.6971019120  |
| O  | 6.6307383090  | 15.6342272750 | 4.9455504650  |
| O  | 6.6293449325  | 12.3853518179 | 8.2581477623  |
| O  | 6.6179554232  | 15.6824558169 | 11.5164615713 |
| O  | 6.6307383090  | 12.3857787220 | 4.2334939360  |
| O  | 6.6307383090  | 15.6342272750 | 7.4819424890  |
| O  | 6.6118471752  | 12.3688763911 | 10.8298986913 |
| O  | 6.6059073878  | 15.5893045036 | 14.0648457184 |
| O  | 8.1102383090  | 16.9024232870 | 2.9652979240  |
| O  | 8.1102383090  | 13.6539747350 | 6.2137464770  |
| O  | 8.0963656421  | 16.8722822411 | 9.4770156591  |
| O  | 8.0899320343  | 13.5564447946 | 12.8955721584 |
| O  | 8.1102383090  | 14.3660312630 | 2.9652979240  |
| O  | 8.1102383090  | 17.6144798160 | 6.2137464770  |
| O  | 8.0949830934  | 14.3213587682 | 9.5654205535  |
| O  | 8.0914390608  | 17.6356699969 | 13.0775645630 |
| Ti | 9.5897383090  | 15.6342272750 | 2.9652979240  |
| Ti | 9.5897383090  | 12.3857787220 | 6.2137464770  |
| Ti | 9.5968032154  | 15.6955499452 | 9.6306531564  |
| Ti | 9.5756074369  | 12.3315155627 | 12.6177494768 |
| Ti | 11.0692383090 | 12.3857787220 | 2.9652979240  |
| Ti | 11.0692383090 | 15.6342272750 | 6.2137464770  |
| Ti | 11.0804573552 | 12.4229269897 | 9.4201404305  |
| Ti | 11.0033951483 | 15.5510871405 | 12.9665874693 |
| O  | 9.5897383090  | 12.3857787220 | 1.6971019120  |
| O  | 9.5897383090  | 15.6342272750 | 4.9455504650  |
| O  | 9.5856735905  | 12.3735884352 | 8.2535957721  |
| O  | 9.5736566141  | 15.6817772062 | 11.5019653188 |
| O  | 9.5897383090  | 12.3857787220 | 4.2334939360  |
| O  | 9.5897383090  | 15.6342272750 | 7.4819424890  |
| O  | 9.5769563529  | 12.3678370143 | 10.8186388185 |

|    |               |               |               |
|----|---------------|---------------|---------------|
| O  | 9.5686219343  | 15.5018129421 | 14.0585756942 |
| O  | 11.0692383090 | 16.9024232870 | 2.9652979240  |
| O  | 11.0692383090 | 13.6539747350 | 6.2137464770  |
| O  | 11.0923475649 | 16.8995298737 | 9.5052770284  |
| O  | 11.0509609733 | 13.5447341279 | 12.8894387723 |
| O  | 11.0692383090 | 14.3660312630 | 2.9652979240  |
| O  | 11.0692383090 | 17.6144798160 | 6.2137464770  |
| O  | 11.0471572352 | 14.3216710990 | 9.4760621983  |
| O  | 11.0966145162 | 17.5711255967 | 12.9158544336 |
| Ti | 12.5487383090 | 15.6342272750 | 2.9652979240  |
| Ti | 12.5487383090 | 12.3857787220 | 6.2137464770  |
| Ti | 12.5698271621 | 15.5794476780 | 9.6213642461  |
| Ti | 12.5536388297 | 12.3279188751 | 12.5553148190 |
| Ti | 14.0282383090 | 12.3857787220 | 2.9652979240  |
| Ti | 14.0282383090 | 15.6342272750 | 6.2137464770  |
| Ti | 14.0532067042 | 12.3025970207 | 9.3447368893  |
| Ti | 13.9674700836 | 15.5472845202 | 12.9645873399 |
| O  | 12.5487383090 | 12.3857787220 | 1.6971019120  |
| O  | 12.5487383090 | 15.6342272750 | 4.9455504650  |
| O  | 12.5277627790 | 12.3748039546 | 8.2154463635  |
| O  | 12.5348719340 | 15.5047184115 | 11.4479324055 |
| O  | 12.5487383090 | 12.3857787220 | 4.2334939360  |
| O  | 12.5487383090 | 15.6342272750 | 7.4819424890  |
| O  | 12.5969943334 | 12.3728093561 | 10.7571093253 |
| O  | 12.5296615531 | 15.5062292537 | 14.0499367341 |
| O  | 14.0282383090 | 16.9024232870 | 2.9652979240  |
| O  | 14.0282383090 | 13.6539747350 | 6.2137464770  |
| O  | 14.0655949229 | 16.8920086184 | 9.5598650809  |
| O  | 14.0119113351 | 13.5417417293 | 12.8926499811 |
| O  | 14.0282383090 | 14.3660312630 | 2.9652979240  |
| O  | 14.0282383090 | 17.6144798160 | 6.2137464770  |
| O  | 14.0212894760 | 14.3176164243 | 9.4655784026  |
| O  | 14.0101280822 | 17.5440808611 | 12.7921820841 |
| Ti | 15.5077383090 | 15.6342272750 | 2.9652979240  |
| Ti | 15.5077383090 | 12.3857787220 | 6.2137464770  |
| Ti | 15.5306974384 | 15.5189490414 | 9.6158382332  |
| Ti | 15.5133461400 | 12.3242266701 | 12.5538341497 |
| Ti | 16.9872383090 | 12.3857787220 | 2.9652979240  |
| Ti | 16.9872383090 | 15.6342272750 | 6.2137464770  |
| Ti | 17.0205221992 | 12.3075491754 | 9.4183292590  |
| Ti | 16.9380882686 | 15.5557817907 | 12.9700633685 |
| O  | 15.5077383090 | 12.3857787220 | 1.6971019120  |
| O  | 15.5077383090 | 15.6342272750 | 4.9455504650  |
| O  | 15.5628789794 | 12.3784066426 | 8.2163074368  |
| O  | 15.5717490353 | 15.5007400976 | 11.4449047829 |
| O  | 15.5077383090 | 12.3857787220 | 4.2334939360  |
| O  | 15.5077383090 | 15.6342272750 | 7.4819424890  |
| O  | 15.4955632501 | 12.3768148918 | 10.7503458927 |
| O  | 15.4765264841 | 15.5910796516 | 14.0477758297 |
| O  | 16.9872383090 | 16.9024232870 | 2.9652979240  |
| O  | 16.9872383090 | 13.6539747350 | 6.2137464770  |
| O  | 17.0055469294 | 16.9093912942 | 9.4888752490  |
| O  | 16.9673801684 | 13.5397384233 | 12.9845383127 |
| O  | 16.9872383090 | 14.3660312630 | 2.9652979240  |
| O  | 16.9872383090 | 17.6144798160 | 6.2137464770  |
| O  | 17.0462472253 | 14.3192357992 | 9.4719854954  |
| O  | 16.9756935766 | 17.5650499976 | 12.8759620965 |
| Au | 10.1175759855 | 4.0775150888  | 19.5253004869 |
| Au | 6.8556173735  | 3.9181829051  | 16.0098822130 |
| Au | 8.3784336865  | 7.7852822085  | 18.6548597714 |
| Au | 12.0719706791 | 5.8539050554  | 15.7114208338 |
| Au | 14.1623553754 | 4.4951836584  | 16.9705302308 |
| Au | 8.9745994455  | 2.6716337667  | 17.3998323787 |
| Au | 8.5717554147  | 5.9789476104  | 20.8486423129 |



|    |               |              |               |
|----|---------------|--------------|---------------|
| Au | 11.1106553122 | 8.6887154340 | 18.6452875896 |
| Au | 9.8756514799  | 7.6641630127 | 16.2827356498 |
| Au | 7.5919540643  | 4.9197235471 | 18.4995149729 |
| Au | 12.5418783301 | 8.6165065396 | 16.2632201851 |
| Au | 9.4764816482  | 4.9671311190 | 15.6478733102 |
| Au | 11.3821796323 | 6.4348359137 | 20.5167419961 |
| Au | 13.1300486795 | 6.8041351875 | 18.2375022108 |
| Au | 11.5851177560 | 3.4225552001 | 17.1413938594 |
| Au | 7.2610185679  | 6.6982332524 | 16.3416228541 |
| Au | 9.6971117089  | 8.6124277041 | 21.0029624795 |
| Au | 12.8965600284 | 4.3453144959 | 19.5247026753 |
